# Supplementary material
Source: PubMed Central journal article supplement (PMC5560113)

# CHEMISTRY

## A **European** Journal

### Supporting Information

#### **Do CH–Anion and Anion– $\pi$ Interactions Alter the Mechanism of 2:1 Host–Guest Complexation in Arylethynyl Monourea Anion Receptors?**

Lisa M. Eytel,<sup>[a]</sup> Annie K. Gilbert,<sup>[a]</sup> Paul Görner,<sup>[a]</sup> Lev N. Zakharov,<sup>[b]</sup> Darren W. Johnson,<sup>\*[a]</sup> and Michael M. Haley<sup>\*[a]</sup>

chem\_201605452\_sm\_miscellaneous\_information.pdf

## **SUPPORTING INFORMATION**

### **Table of Contents**

|                         |     |
|-------------------------|-----|
| Experimental Procedures | S2  |
| X-Ray Crystallography   | S4  |
| NMR Titrations          | S5  |
| UV-Vis Titrations       | S20 |
| Job's Plot Analysis     | S22 |
| References              | S24 |
| NMR Spectra             | S25 |

## Experimental Procedures

**General methods.**  $^1\text{H}$ ,  $^{13}\text{C}$ , and  $^{19}\text{F}$  NMR spectra were obtained on a Varian Mercury 300 MHz ( $^1\text{H}$ : 300.09 MHz), Inova 500 MHz ( $^1\text{H}$ : 500.10 MHz,  $^{13}\text{C}$  125.75 MHz,  $^{19}\text{F}$ : 470.56 MHz), or Bruker Avance III HD 600 MHz NMR spectrometer with Prodigy multinuclear broadband BBO CryoProbe ( $^1\text{H}$ : 600.02 MHz,  $^{13}\text{C}$ : 150.89 MHz). Chemical shifts ( $\delta$ ) are expressed in ppm downfield from tetramethylsilane (TMS) using non-deuterated solvent present in the bulk deuterated solvent ( $\text{CDCl}_3$ ,  $^1\text{H}$  7.26 ppm,  $^{13}\text{C}$  77.16 ppm;  $d_6$ -DMSO:  $^1\text{H}$  2.50 ppm,  $^{13}\text{C}$  39.52 ppm;  $d_6$ -acetone  $^1\text{H}$  2.05 ppm,  $^{13}\text{C}$  206.7 ppm, 29.9 ppm). Mixed solvent systems were referenced to the most abundant solvent. All NMR spectra were processed using MestReNova NMR processing software. Unless otherwise specified, all materials were obtained from TCI-America, Sigma-Aldrich, or Acros and used as received. Tetrabutylammonium salts were dried at 50 °C *in vacuo* prior to use. Aniline **5** was synthesized and desilated following known procedures.<sup>1</sup>

**3,5-Dinitrophenyl aniline 6.** In a sealable flask, 1-iodo-3,5-dinitrobenzene (1.20 g, 4.08 mmol) was dissolved in DIPA (20 mL) and THF (20 mL). The mixture was purged with  $\text{N}_2$  for 30 min, then CuI (0.076 g, 0.408 mmol) was added. The mixture was purged for an additional 30 min, followed by the addition of  $\text{Pd}(\text{PPh}_3)_4$  (0.38 g, 0.327 mmol). An  $\text{N}_2$ -purged solution of 4-*tert*-butyl-2-ethynylaniline (1.05 g, 6.05 mmol) in DIPA (10 mL) and THF (10 mL) was then transferred into the flask via cannula. The flask was sealed and the mixture was stirred overnight at 50 °C. The cooled solution was filtered through a 6 cm silica gel plug eluting with  $\text{CH}_2\text{Cl}_2$  and the concentrated *in vacuo*. Column chromatography (2:1 EtOAc:hexanes) of the crude material afforded **6** (1.24 g, 87%) as an orange solid.  $^1\text{H}$  NMR (500 MHz,  $\text{CDCl}_3$ )  $\delta$  8.95 (t,  $J = 1.8$  Hz, 1H), 8.64 (d,  $J = 2.0$  Hz, 2H), 7.41 (d,  $J = 2.1$  Hz, 1H), 7.17 (d,  $J = 7.5$  Hz, 1H), 6.72 (d,  $J = 8.4$  Hz, 1H), 4.21 (s, 2H), 1.30 (s, 9H).  $^{13}\text{C}$  NMR (126 MHz,  $\text{CDCl}_3$ )  $\delta$  148.94, 146.56, 141.69, 140.39, 129.54, 129.43, 127.77, 117.84, 115.17, 105.45, 93.43, 90.39, 34.40, 31.74. HRMS (TOF-MS-ES<sup>-</sup>) for  $\text{C}_{18}\text{H}_{16}\text{N}_3\text{O}_4$  [ $\text{M}-\text{H}$ ]<sup>-</sup>: calcd 338.1141, found 338.1157.

**Pentafluorophenyl aniline 7.** Following the procedure for the synthesis of **6**, iodopentafluorobenzene (1.25 g, 4.25 mmol) was reacted with 4-*tert*-butyl-2-ethynylaniline (1.11 g, 6.38 mmol) in the presence of THF (25 mL), DIPA (25 mL), CuI (0.040 g, 0.21 mmol), and

Pd(PPh<sub>3</sub>)<sub>4</sub> (0.393 g, 0.340 mmol). Product **7** was obtained via a silica plug (2:1 hexanes:EtOAc) as a black-brown solid and used without further purification (1.04 g, 72%). <sup>1</sup>H NMR (500 MHz, CDCl<sub>3</sub>) δ 7.36 (d, *J* = 2.3 Hz, 1H), 7.21 (dd, *J* = 8.5, 2.4 Hz, 1H), 6.73 (d, *J* = 8.7 Hz, 1H), 4.52 (s, 2H), 1.26 (s, 9H). <sup>13</sup>C{<sup>19</sup>F} NMR (126 MHz, CDCl<sub>3</sub>) δ 147.25, 146.24, 141.08, 129.62, 128.91, 128.73, 128.22, 114.60, 106.01, 105.56, 80.31, 78.72, 34.08, 31.47. <sup>19</sup>F NMR (471 MHz, CDCl<sub>3</sub>) δ -136.62 (dd, *J* = 22.1, 7.7 Hz), -153.44 (t, *J* = 41.0 Hz), -161.86 (m). HRMS (TOF-MS-ES<sup>+</sup>) for C<sub>18</sub>H<sub>15</sub>NF<sub>5</sub> [M-H]<sup>+</sup>: calcd 340.1125, found 340.1137.

**3,5-Dinitrophenyl receptor 3.** In flame dried glassware, aniline **6** (0.250 g, 0.737 mmol) and *p*-nitrophenyl isocyanate (0.212 g, 1.29 mmol) was dissolved in freshly distilled toluene (75 mL). The reaction mixture was stirred for 48 h at 50 °C. The reaction was quenched with acetone, allowed to cool, and concentrated *in vacuo*. Product **3** was precipitated with acetone from a hexanes solution (0.271 g, 73%) as an orange solid. <sup>1</sup>H NMR (500 MHz, *d*<sub>6</sub>-acetone) δ 9.18 (s, 1H), 8.91 (t, *J* = 2.1 Hz, 1H), 8.34 (s, 1H), 8.24 (d, *J* = 9.1 Hz, 2H), 8.19 (d, *J* = 2.6 Hz, 1H), 7.80 (d, *J* = 9.2 Hz, 2H), 7.72 (d, *J* = 2.4 Hz, 1H), 7.57 (dd, *J* = 8.9, 2.4 Hz, 1H), 1.36 (s, 9H). <sup>13</sup>C NMR (126 MHz, *d*<sub>6</sub>-acetone) δ 152.65, 149.82, 147.10, 146.93, 143.21, 139.15, 132.21, 130.51, 129.23, 127.29, 125.98, 121.14, 119.19, 118.85, 111.74, 92.10, 91.43, 35.08, 31.63. HRMS (TOF-MS-ES<sup>-</sup>) for C<sub>25</sub>H<sub>20</sub>N<sub>5</sub>O<sub>7</sub> [M-H]<sup>-</sup>: calcd 502.1363, found 502.1358.

**Pentafluorophenyl receptor 4.** In flame dried glassware, aniline **7** (0.500 g, 1.47 mmol) and *p*-nitrophenyl isocyanate (0.423 g, 2.58 mmol) was dissolved in freshly distilled toluene (150 mL). The reaction mixture was stirred for 72 h at 50 °C. The reaction was quenched with acetone, allowed to cool, and concentrated *in vacuo*. Pure product **4** was precipitated out of hot EtOAc (0.574 g, 71%) as a yellow solid. <sup>1</sup>H NMR (500 MHz, *d*<sub>6</sub>-DMSO/CDCl<sub>3</sub>) δ 9.52 (s, 1H), 8.04 (s, 1H), 7.86 (dd, *J* = 9.2, 2.1 Hz, 2H), 7.83 (d, *J* = 8.8 Hz, 1H), 7.37 (dd, *J* = 9.1, 2.3 Hz, 2H), 7.18 (d, *J* = 2.3 Hz, 1H), 7.16 (dd, *J* = 8.8, 2.4 Hz, 1H), 1.05 (s, 9H). <sup>13</sup>C{<sup>19</sup>F} (125.75 MHz, *d*<sub>6</sub>-DMSO/CDCl<sub>3</sub>) 151.99, 145.76, 145.63, 145.57, 145.55, 138.52, 129.46, 127.91, 127.79, 124.96, 124.77, 120.10, 117.24, 110.03, 109.80, 79.91, 79.26, 39.99, 30.88. <sup>19</sup>F NMR (471 MHz, *d*<sub>6</sub>-DMSO/CDCl<sub>3</sub>) δ -135.24 (m), -152.00 (m), -161.49 (m). HRMS (TOF-MS-ES<sup>+</sup>) for C<sub>25</sub>H<sub>18</sub>F<sub>5</sub>N<sub>3</sub>O<sub>7</sub> [M-H]<sup>+</sup>: calcd 504.1347, found 504.1350.

## X-Ray Crystallography

**General details.** Diffraction intensities were collected at 173 K on a Bruker Apex2 CCD diffractometer using CuK $\alpha$  radiation,  $\lambda = 1.54178 \text{ \AA}$ . Space group was determined based on systematic absences. Absorption correction was applied by SADABS.<sup>2</sup> Structure was solved by direct methods and Fourier techniques and refined on  $F^2$  using full matrix least-squares procedures. All non-H atoms were refined with anisotropic thermal parameters. All H atoms were refined in calculated positions in a rigid group model. There are two symmetrically independent molecules in the crystal structure. One of the terminal –Me groups in the [N(*n*-Bu)<sub>4</sub>]<sup>+</sup> cation is disordered over two positions in the ratio 0.69/0.31. The Br<sup>–</sup> anion forms H-bonds to the two main molecules. Crystals of the investigated compound were very small needles and even using a strong *Incoatec I $\mu$ S Cu* source the diffraction data were collected only up to  $2\theta_{\max} = 100^\circ$ . The reflections at high angles were very weak and as a result reflection statistics at high angles is poor and value of  $R_{\text{int}}$  is high. While the found X-ray structure is not precise, it provides clear chemical information about the formed complex. All calculations were performed by the Bruker SHELXL-2013 package.<sup>3</sup>

**Crystal structure 3 $\cdot$ (*n*-Bu)<sub>4</sub>NBr.** C<sub>68</sub>H<sub>84</sub>BrN<sub>11</sub>O<sub>15</sub>S,  $M = 1407.43$ ,  $0.23 \times 0.01 \times 0.01$  mm,  $T = 173 \text{ K}$ , Monoclinic, space group  $P2_1/c$ ,  $a = 20.6647(10) \text{ \AA}$ ,  $b = 10.3192(5) \text{ \AA}$ ,  $c = 35.0367(16) \text{ \AA}$ ,  $\beta = 104.992(3)^\circ$ ,  $V = 7217.0(6) \text{ \AA}^3$ ,  $Z = 4$ ,  $D_c = 1.295 \text{ Mg/m}^3$ ,  $\mu(\text{Cu}) = 1.630 \text{ mm}^{-1}$ ,  $F(000) = 2960$ ,  $2\theta_{\max} = 100.0^\circ$ , 25199 reflections, 7300 independent reflections [ $R_{\text{int}} = 0.3631$ ],  $R1 = 0.1166$ ,  $wR2 = 0.2657$  and  $\text{GOF} = 0.974$  for 7300 reflections (850 parameters) with  $I > 2\sigma(I)$ ,  $R1 = 0.3173$ ,  $wR2 = 0.3633$  and  $\text{GOF} = 0.974$  for all reflections, max/min residual electron density  $+1.343/-0.516 \text{ e\AA}^3$ . CCDC 1507418 contains the supplementary crystallographic data for these compounds. These data can be obtained free of charge from The Cambridge Crystallographic Data Centre via [www.ccdc.cam.ac.uk/data\\_request/cif](http://www.ccdc.cam.ac.uk/data_request/cif).

## Titration

**General Titration Procedures.** Concentration of receptor was kept constant by preparing a stock solution of the receptor and performing a serial dilution with the receptor stock solution to dissolve the guest. Receptor concentration was maintained constant throughout the titration to avoid concentration effects on the proton chemical shifts. Tetrabutylammonium salts, purchased from TCI America or SigmaAldrich, were dried by heating to 50 °C *in vacuo* before use. Hamilton gas-tight syringes were used for all titrations. Titrations were performed in triplicate and the reported association constants represent the average fits across all titrations. Representative data are provided for each receptor and halide.

**<sup>1</sup>H NMR Titration Conditions.** <sup>1</sup>H NMR titrations were carried out on an Inova 500 MHz NMR spectrometer (<sup>1</sup>H: 500.10 MHz). Chemical shifts ( $\delta$ ) are expressed in ppm downfield from tetramethylsilane (TMS) using non-deuterated solvent present in the bulk deuterated solvent (CDCl<sub>3</sub>, <sup>1</sup>H 7.26 ppm; *d*<sub>6</sub>-DMSO: <sup>1</sup>H 2.50 ppm). Mixed solvent systems were referenced to the most abundant solvent. All NMR spectra were processed using MestReNova NMR processing software. Association constants were determined using step-wise non-linear regression fitting in MatLab.<sup>4</sup>

**Tetrabutylammonium chloride with 3.** A concentrated solution of **3** (2.45 mg, [R]=4.87 mM) in 10% *d*<sub>6</sub>-DMSO/CDCl<sub>3</sub> (1.00 mL) was prepared. A serial dilution was then performed with 250  $\mu$ L of 4.87 mM solution of **3** diluted to 3 mL to yield the stock solution of **3** ([R]=0.406 mM). This solution was used in the dilution of TBACl guest solution (6.53 mg, [G]= 9.98 mM). The remaining stock solution (0.600 mL) was used as the starting volume in the NMR tube.

**Table S1.** Representative titration data for Cl<sup>-</sup> with **3**.

|    | Guest (μL) | [ <b>1</b> ] (M) | [Cl <sup>-</sup> ] (M) | Equiv. | H <sup>c</sup> δ (ppm) | H <sup>a</sup> δ (ppm) | H <sup>b</sup> δ (ppm) |
|----|------------|------------------|------------------------|--------|------------------------|------------------------|------------------------|
| 1  | 0          | 4.06E-04         | 0.00E+00               | 0.00   | 9.553                  | 8.725                  | 8.126                  |
| 2  | 5          | 4.06E-04         | 8.25E-05               | 0.20   | 9.634                  | 8.737                  | 8.167                  |
| 3  | 10         | 4.06E-04         | 1.64E-04               | 0.40   | 9.713                  | 8.751                  | 8.208                  |
| 4  | 15         | 4.06E-04         | 2.43E-04               | 0.60   | 9.783                  | 8.759                  | 8.244                  |
| 5  | 20         | 4.06E-04         | 3.22E-04               | 0.79   | 9.844                  | 8.771                  | 8.276                  |
| 6  | 25         | 4.06E-04         | 3.99E-04               | 0.98   | 9.901                  | 8.779                  | 8.304                  |
| 7  | 30         | 4.06E-04         | 4.75E-04               | 1.17   | 9.950                  | 8.785                  | 8.329                  |
| 8  | 35         | 4.06E-04         | 5.50E-04               | 1.36   | 9.998                  | 8.794                  | 8.354                  |
| 9  | 40         | 4.06E-04         | 6.24E-04               | 1.54   | 10.039                 | 8.800                  | 8.375                  |
| 10 | 50         | 4.06E-04         | 7.67E-04               | 1.89   | 10.114                 | 8.813                  | 8.417                  |
| 11 | 60         | 4.06E-04         | 9.07E-04               | 2.24   | 10.186                 | 8.824                  | 8.452                  |
| 12 | 80         | 4.06E-04         | 1.17E-03               | 2.89   | 10.295                 | 8.842                  | 8.508                  |
| 13 | 100        | 4.06E-04         | 1.43E-03               | 3.51   | 10.385                 | 8.857                  | 8.556                  |
| 14 | 150        | 4.06E-04         | 2.00E-03               | 4.92   | 10.550                 | 8.885                  | 8.641                  |
| 15 | 200        | 4.06E-04         | 2.49E-03               | 6.15   | 10.661                 | 8.903                  | 8.709                  |
| 16 | 300        | 4.06E-04         | 3.33E-03               | 8.20   | 10.789                 | 8.929                  | 8.770                  |
| 17 | 400        | 4.06E-04         | 3.99E-03               | 9.84   | 10.873                 | 8.939                  | 8.810                  |
| 18 | 600        | 4.06E-04         | 4.99E-03               | 12.30  | 10.926                 | 8.952                  | 8.840                  |

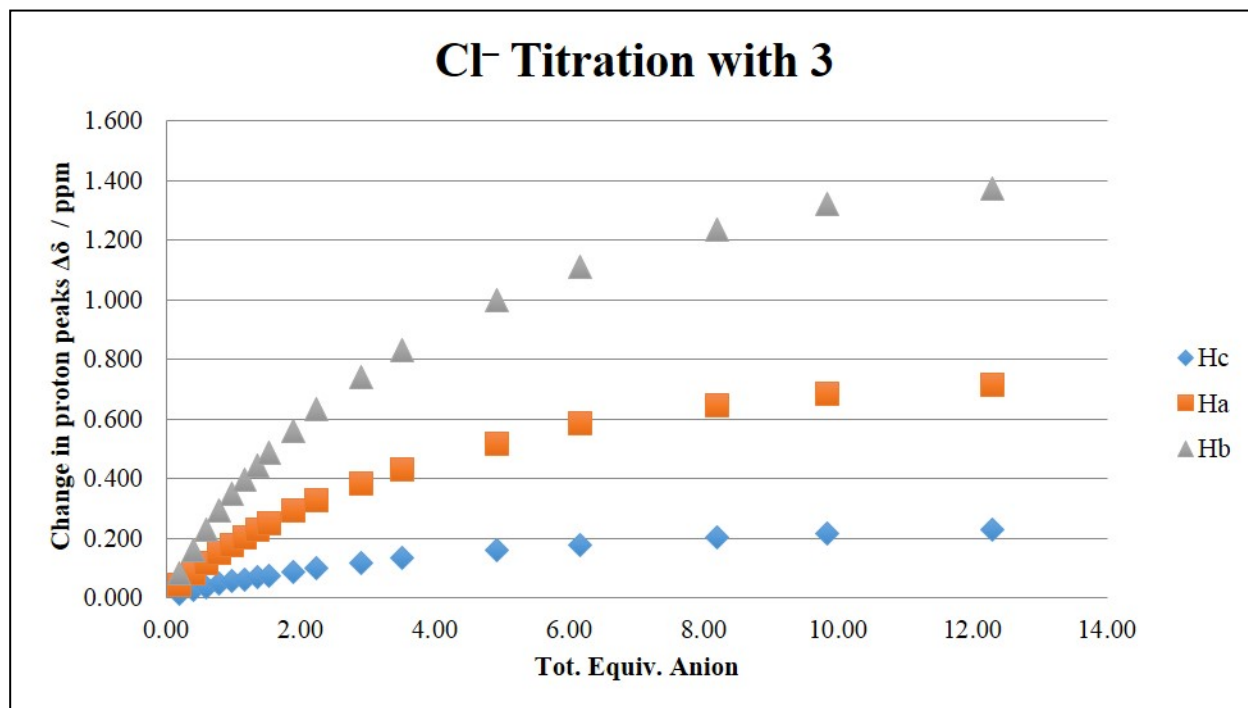

**Figure S1.** Binding isotherm for Cl<sup>-</sup> titration with **3** in 10% *d*<sub>6</sub>-DMSO/CDCl<sub>3</sub> by <sup>1</sup>H NMR.

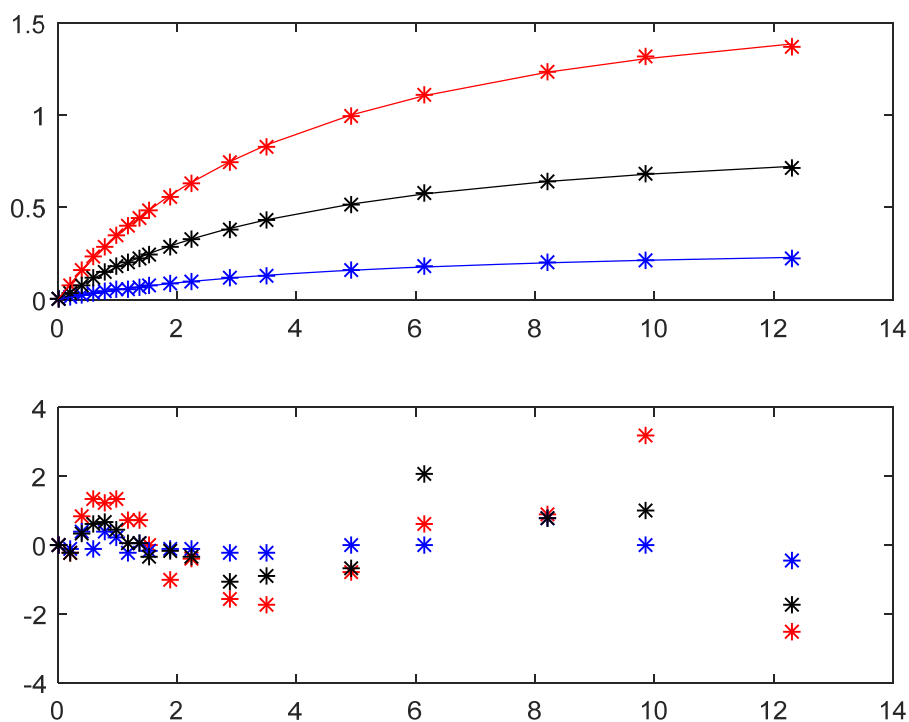

**Figure S2.** MatLab fit of binding isotherm for  $\text{Cl}^-$  titration with **3**.

**Tetrabutylammonium bromide with 3.** A concentrated solution of **3** (5.16 mg,  $[\text{R}]=5.12$  mM) in 10%  $d_6$ -DMSO/ $\text{CDCl}_3$  (2.00 mL) was prepared. A serial dilution was then performed with 590  $\mu\text{L}$  of 5.12 mM solution of **3** diluted to 3 mL to yield the stock solution of **3** ( $[\text{R}]=1.01$  mM). This solution was used in the dilution of TBABr guest solution (45.03 mg,  $[\text{G}]=6.00$  mM). The remaining stock solution (0.600 mL) was used as the starting volume in the NMR tube.



**Table S2.** Representative titration data for Br<sup>-</sup> with **3**.

|    | Guest (μL) | [ <b>1</b> ] (M) | [Br <sup>-</sup> ] (M) | Equiv. | H <sup>c</sup> δ (ppm) | H <sup>a</sup> δ (ppm) | H <sup>b</sup> δ (ppm) |
|----|------------|------------------|------------------------|--------|------------------------|------------------------|------------------------|
| 1  | 0          | 1.01E-03         | 0.00E+00               | 0.00   | 9.590                  | 8.730                  | 8.144                  |
| 2  | 5          | 1.01E-03         | 4.95E-04               | 0.49   | 9.743                  | 8.759                  | 8.225                  |
| 3  | 10         | 1.01E-03         | 9.83E-04               | 0.98   | 9.828                  | 8.770                  | 8.270                  |
| 4  | 15         | 1.01E-03         | 1.46E-03               | 1.45   | 9.900                  | 8.784                  | 8.310                  |
| 5  | 20         | 1.01E-03         | 1.93E-03               | 1.92   | 9.943                  | 8.793                  | 8.333                  |
| 6  | 25         | 1.01E-03         | 2.40E-03               | 2.38   | 9.984                  | 8.799                  | 8.356                  |
| 7  | 30         | 1.01E-03         | 2.85E-03               | 2.83   | 10.024                 | 8.805                  | 8.377                  |
| 8  | 35         | 1.01E-03         | 3.30E-03               | 3.28   | 10.058                 | 8.810                  | 8.395                  |
| 9  | 40         | 1.01E-03         | 3.75E-03               | 3.72   | 10.089                 | 8.816                  | 8.412                  |
| 10 | 50         | 1.01E-03         | 4.61E-03               | 4.58   | 10.139                 | 8.825                  | 8.440                  |
| 11 | 60         | 1.01E-03         | 5.45E-03               | 5.41   | 10.194                 | 8.834                  | 8.470                  |
| 12 | 80         | 1.01E-03         | 7.05E-03               | 7.00   | 10.258                 | 8.846                  | 8.506                  |
| 13 | 100        | 1.01E-03         | 8.56E-03               | 8.50   | 10.312                 | 8.855                  | 8.534                  |
| 14 | 150        | 1.01E-03         | 1.20E-02               | 11.90  | 10.415                 | 8.873                  | 8.592                  |
| 15 | 200        | 1.01E-03         | 1.50E-02               | 14.87  | 10.458                 | 8.885                  | 8.616                  |
| 16 | 300        | 1.01E-03         | 2.00E-02               | 19.83  | 10.544                 | 8.896                  | 8.662                  |
| 17 | 400        | 1.01E-03         | 2.40E-02               | 23.79  | 10.581                 | 8.904                  | 8.682                  |
| 18 | 600        | 1.01E-03         | 3.00E-02               | 29.74  | 10.589                 | 8.904                  | 8.693                  |

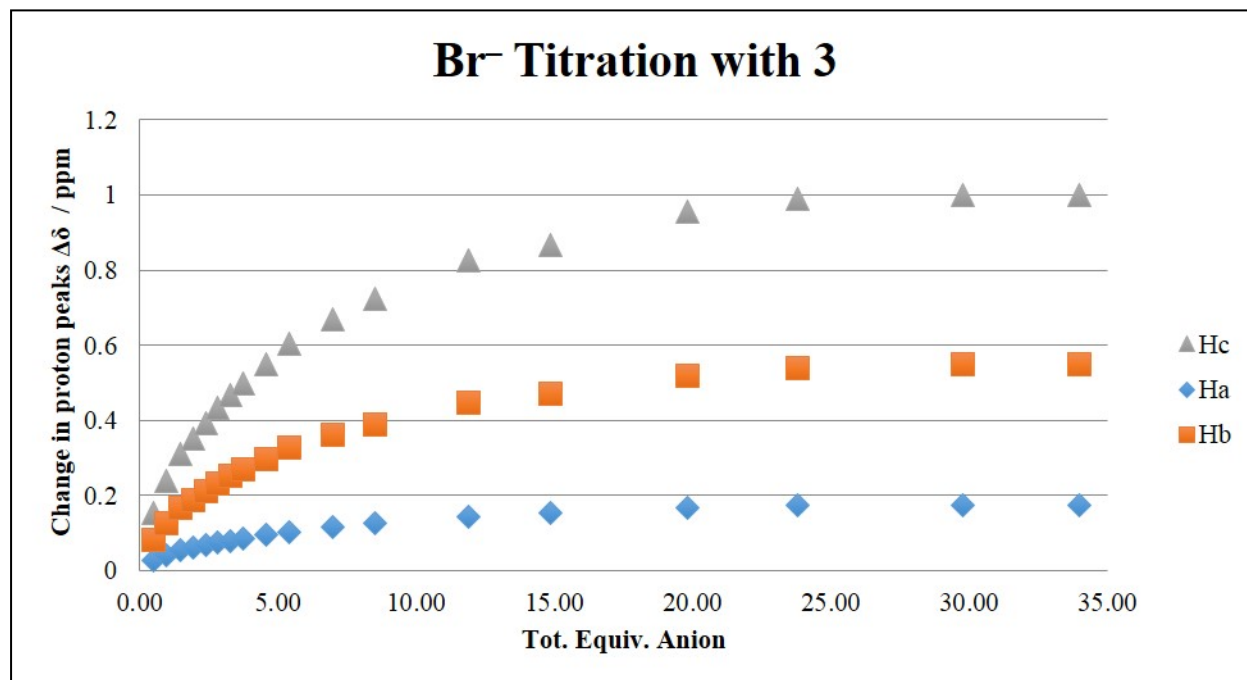

**Figure S3.** Binding isotherm for Br<sup>-</sup> titration with **3** in 10% *d*<sub>6</sub>-DMSO/CDCl<sub>3</sub> by <sup>1</sup>H NMR.

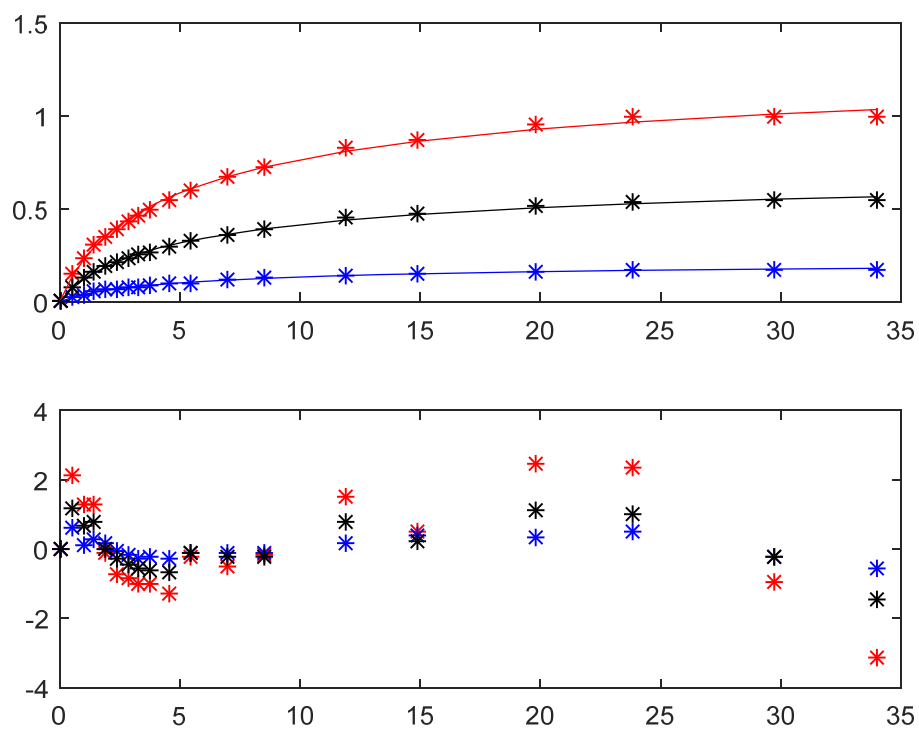

**Figure S4.** MatLab fit of binding isotherm for  $\text{Br}^-$  titration with **3**.

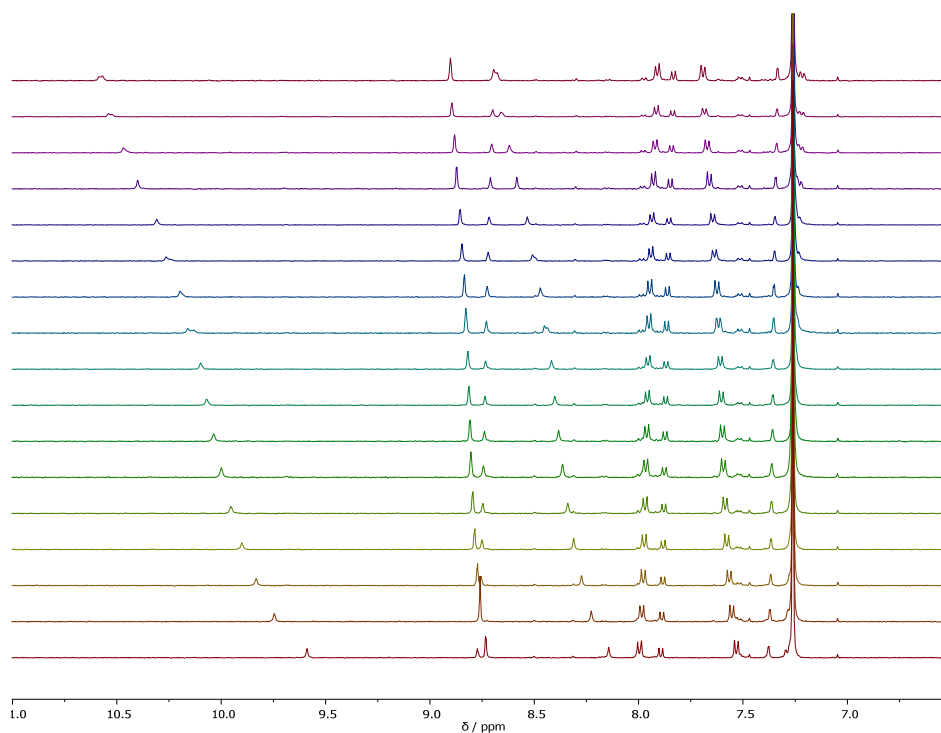

**Figure S5.**  $^1\text{H}$  NMR spectra of  $\text{Br}^-$  titration with **3**.

**Tetrabutylammonium iodide with 3.** A concentrated solution of **3** (5.22 mg, [R]=5.18 mM) in 10% *d*<sub>6</sub>-DMSO/CDCl<sub>3</sub> (2.00 mL) was prepared. A serial dilution was then performed with 590 μL of 5.18 mM solution of **3** diluted to 3 mL to yield the stock solution of **3** ([R]=1.02 mM). This solution was used in the dilution of TBAI guest solution (51.76 mg, [G]=5.94 mM). The remaining stock solution (0.600 mL) was used as the starting volume in the NMR tube.

**Table S3.** Representative titration data for I<sup>-</sup> with **3**.

|    | Guest (μL) | [ <b>1</b> ] (M) | [I <sup>-</sup> ] (M) | Equiv. | H <sup>c</sup> δ (ppm) | H <sup>a</sup> δ (ppm) | H <sup>b</sup> δ (ppm) |
|----|------------|------------------|-----------------------|--------|------------------------|------------------------|------------------------|
| 1  | 0          | 1.01E-03         | 0.00E+00              | 0.00   | 9.590                  | 8.730                  | 8.144                  |
| 2  | 5          | 1.01E-03         | 4.95E-04              | 0.49   | 9.743                  | 8.759                  | 8.225                  |
| 3  | 10         | 1.01E-03         | 9.83E-04              | 0.98   | 9.828                  | 8.770                  | 8.270                  |
| 4  | 15         | 1.01E-03         | 1.46E-03              | 1.45   | 9.900                  | 8.784                  | 8.310                  |
| 5  | 20         | 1.01E-03         | 1.93E-03              | 1.92   | 9.943                  | 8.793                  | 8.333                  |
| 6  | 25         | 1.01E-03         | 2.40E-03              | 2.38   | 9.984                  | 8.799                  | 8.356                  |
| 7  | 30         | 1.01E-03         | 2.85E-03              | 2.83   | 10.024                 | 8.805                  | 8.377                  |
| 8  | 35         | 1.01E-03         | 3.30E-03              | 3.28   | 10.058                 | 8.810                  | 8.395                  |
| 9  | 40         | 1.01E-03         | 3.75E-03              | 3.72   | 10.089                 | 8.816                  | 8.412                  |
| 10 | 50         | 1.01E-03         | 4.61E-03              | 4.58   | 10.139                 | 8.825                  | 8.440                  |
| 11 | 60         | 1.01E-03         | 5.45E-03              | 5.41   | 10.194                 | 8.834                  | 8.470                  |
| 12 | 80         | 1.01E-03         | 7.05E-03              | 7.00   | 10.258                 | 8.846                  | 8.506                  |
| 13 | 100        | 1.01E-03         | 8.56E-03              | 8.50   | 10.312                 | 8.855                  | 8.534                  |
| 14 | 150        | 1.01E-03         | 1.20E-02              | 11.90  | 10.415                 | 8.873                  | 8.592                  |
| 15 | 200        | 1.01E-03         | 1.50E-02              | 14.87  | 10.458                 | 8.885                  | 8.616                  |
| 16 | 300        | 1.01E-03         | 2.00E-02              | 19.83  | 10.544                 | 8.896                  | 8.662                  |
| 17 | 400        | 1.01E-03         | 2.40E-02              | 23.79  | 10.581                 | 8.904                  | 8.682                  |
| 18 | 600        | 1.01E-03         | 3.00E-02              | 29.74  | 10.589                 | 8.904                  | 8.693                  |

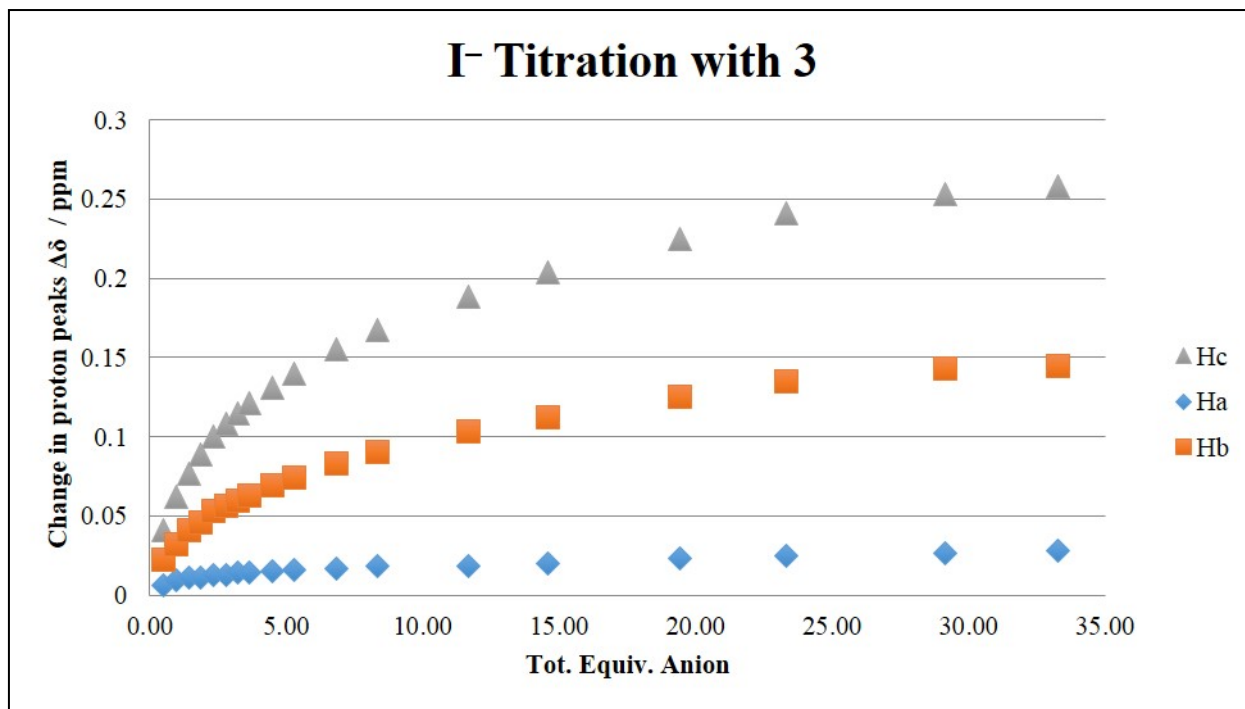

**Figure S6.** Binding isotherm for I<sup>-</sup> titration with **3** in 10% *d*<sub>6</sub>-DMSO/CDCl<sub>3</sub> by <sup>1</sup>H NMR.

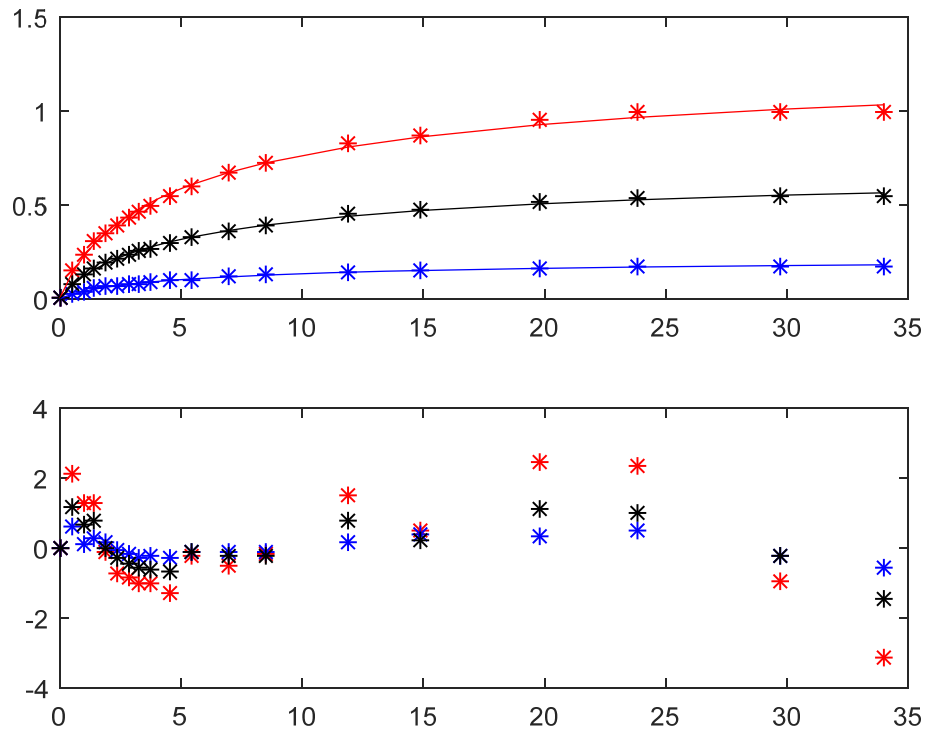

**Figure S7.** MatLab fit of binding isotherm for I<sup>-</sup> titration with **3**.

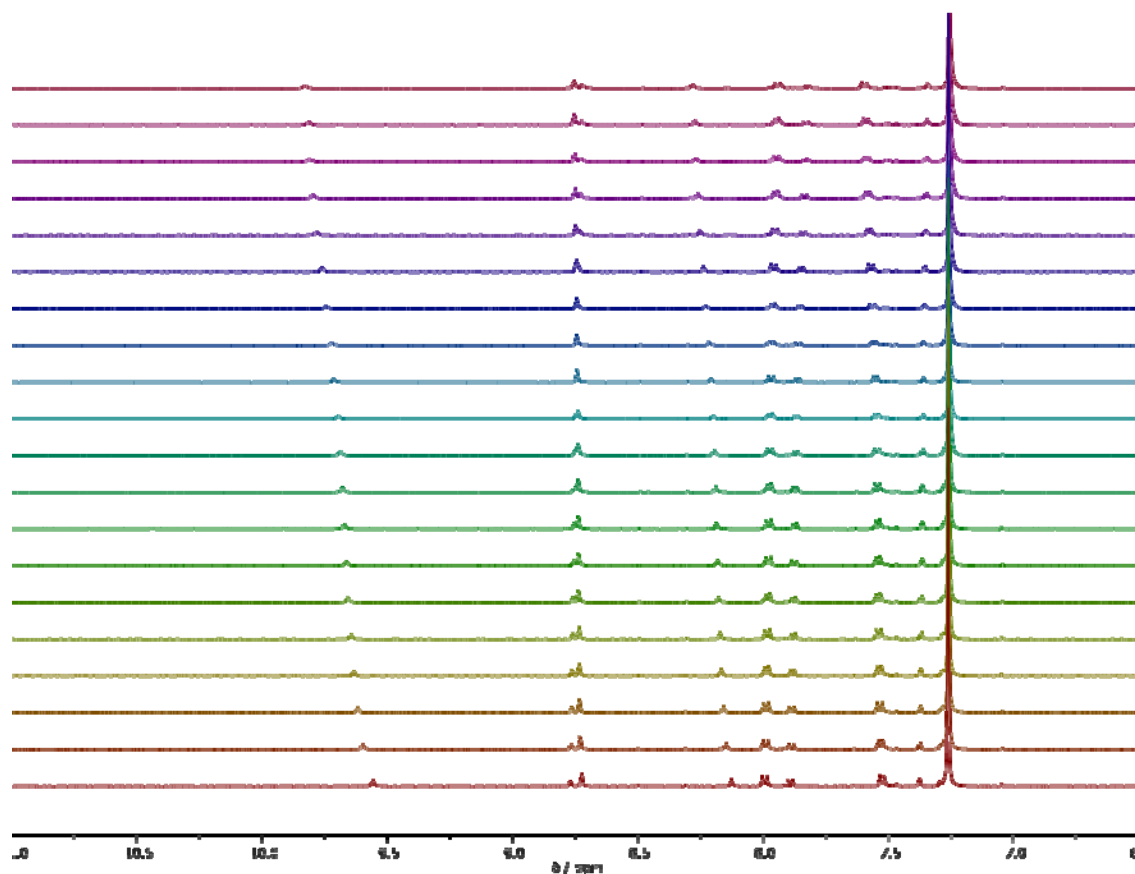

**Figure S8.**  $^1\text{H}$  NMR spectra of  $\text{I}^-$  titration with **3**.

**Tetrabutylammonium chloride with 4.** A concentrated solution of **4** (2.96mg,  $[\text{R}]=5.88$  mM) in 10%  $d_6$ -DMSO/ $\text{CDCl}_3$  (1.00 mL) was prepared. A serial dilution was then performed with 511  $\mu\text{L}$  of 5.88 mM solution of **4** diluted to 3 mL to yield the stock solution of **4** ( $[\text{R}]=1.00$  mM). This solution was used in the dilution of TBACl guest solution (9.56 mg,  $[\text{G}]=14.9$  mM). The remaining stock solution (0.600 mL) was used as the starting volume in the NMR tube. The calculated association constants for the titration of TBACl with **4** were at the limits of  $^1\text{H}$  NMR titrations, although errors were less than 15% across three titrations. The  $\mu\text{M}$  concentrations needed to obtain UV-Vis spectroscopy titration data dilute out the expected 2:1 host-guest model, however, leading to titrations only appropriately fit to a 1:1 host-guest model.

**Table S4.** Representative titration data for Cl<sup>-</sup> with **4**.

|    | Guest (μL) | [ <b>2</b> ] (M) | [Cl <sup>-</sup> ] (M) | Equiv. | H <sup>a</sup> δ (ppm) | H <sup>b</sup> δ (ppm) |
|----|------------|------------------|------------------------|--------|------------------------|------------------------|
| 1  | 0          | 1.00E-03         | 0.00E+00               | 0.00   | 9.617                  | 8.119                  |
| 2  | 5          | 1.00E-03         | 1.23E-04               | 0.12   | 9.888                  | 8.230                  |
| 3  | 10         | 1.00E-03         | 2.44E-04               | 0.24   | 10.145                 | 8.335                  |
| 4  | 15         | 1.00E-03         | 3.62E-04               | 0.36   | 10.379                 | 8.428                  |
| 5  | 20         | 1.00E-03         | 4.79E-04               | 0.48   | 10.562                 | 8.502                  |
| 6  | 25         | 1.00E-03         | 5.94E-04               | 0.59   | 10.695                 | 8.555                  |
| 7  | 30         | 1.00E-03         | 7.08E-04               | 0.71   | 10.775                 | 8.587                  |
| 8  | 35         | 1.00E-03         | 8.19E-04               | 0.82   | 10.819                 | 8.604                  |
| 9  | 40         | 1.00E-03         | 9.29E-04               | 0.93   | 10.847                 | 8.615                  |
| 10 | 50         | 1.00E-03         | 1.14E-03               | 1.14   | 10.877                 | 8.626                  |
| 11 | 60         | 1.00E-03         | 1.35E-03               | 1.35   | 10.892                 | 8.631                  |
| 12 | 80         | 1.00E-03         | 1.75E-03               | 1.75   | 10.910                 | 8.637                  |
| 13 | 100        | 1.00E-03         | 2.12E-03               | 2.12   | 10.919                 | 8.640                  |
| 14 | 150        | 1.00E-03         | 2.97E-03               | 2.97   | 10.929                 | 8.643                  |
| 15 | 200        | 1.00E-03         | 3.71E-03               | 3.71   | 10.933                 | 8.643                  |
| 16 | 300        | 1.00E-03         | 4.95E-03               | 4.95   | 10.939                 | 8.645                  |
| 17 | 400        | 1.00E-03         | 5.94E-03               | 5.93   | 10.941                 | 8.645                  |
| 18 | 600        | 1.00E-03         | 7.43E-03               | 7.42   | 10.944                 | 8.646                  |

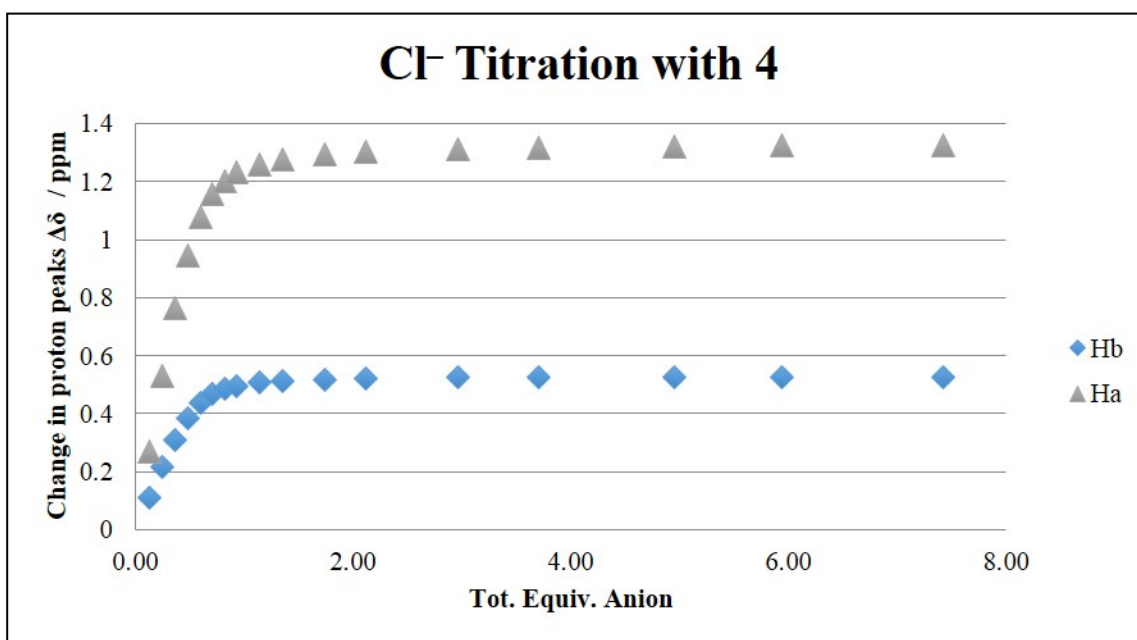

**Figure S9.** Binding isotherm for Cl<sup>-</sup> titration with **4** in 10% *d*<sub>6</sub>-DMSO/CDCl<sub>3</sub> by <sup>1</sup>H NMR.

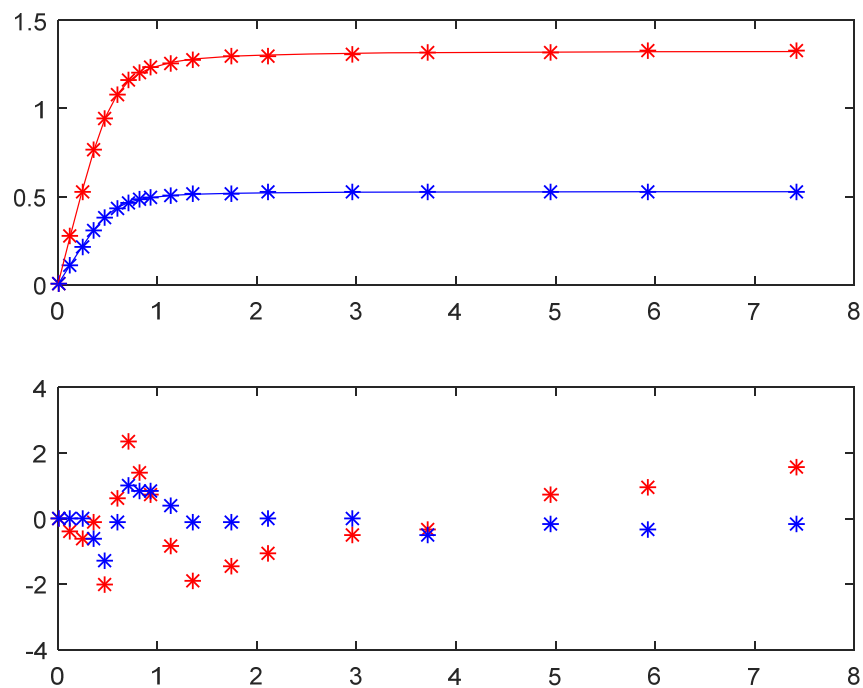

**Figure S10.** MatLab fit of binding isotherm for  $\text{Cl}^-$  titration with **4**.

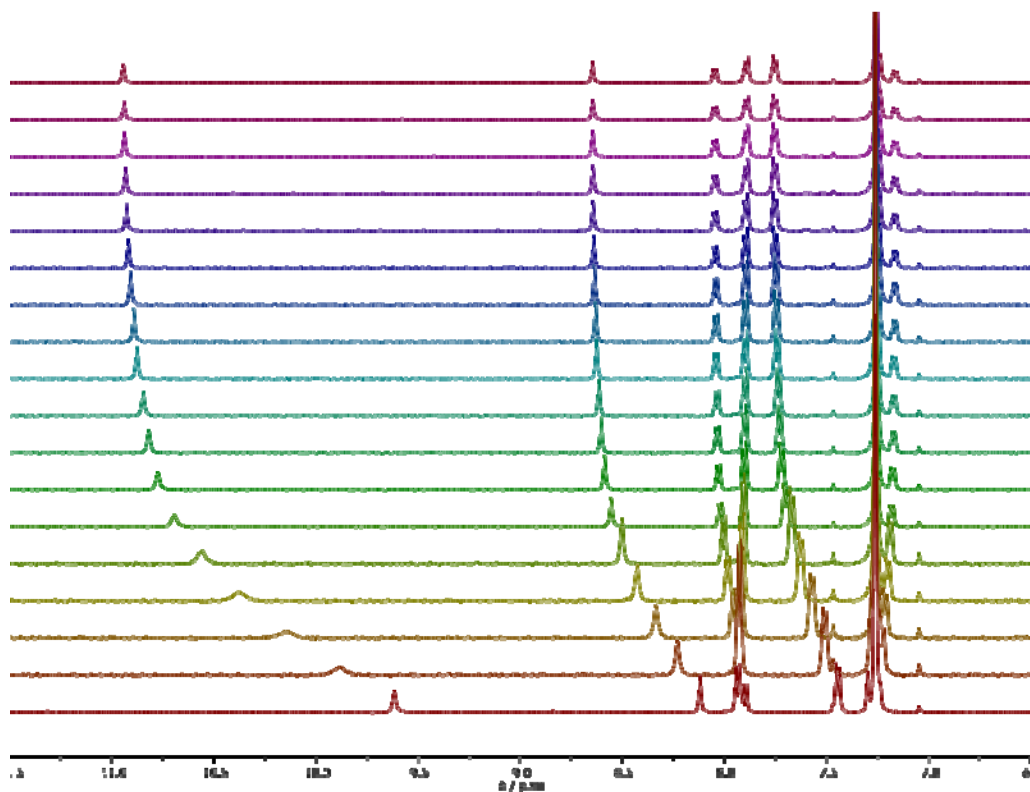

**Figure S11.**  $^1\text{H}$  NMR spectra of  $\text{Cl}^-$  titration with **4**.

**Tetrabutylammonium bromide with 4.** A concentrated solution of **4** (5.21 mg, [R]=5.17 mM) in 10% *d*<sub>6</sub>-DMSO/CDCl<sub>3</sub> (2.00 mL) was prepared. A serial dilution was then performed with 590 μL of 5.17 mM solution of **4** diluted to 3 mL to yield the stock solution of **4** ([R]=1.02 mM). This solution was used in the dilution of TBABr guest solution (23.01 mg, [G]=31.0 mM). The remaining stock solution (0.600 mL) was used as the starting volume in the NMR tube.

**Table S5.** Representative titration data for Br<sup>-</sup> with **2**.

|    | Guest (μL) | [ <b>2</b> ] (M) | [Br <sup>-</sup> ] (M) | Equiv. | H <sup>a</sup> δ (ppm) | H <sup>b</sup> δ (ppm) |
|----|------------|------------------|------------------------|--------|------------------------|------------------------|
| 1  | 0          | 1.02E-03         | 0.00E+00               | 0.25   | 9.754                  | 8.178                  |
| 2  | 5          | 1.02E-03         | 2.56E-04               | 0.50   | 9.975                  | 8.285                  |
| 3  | 10         | 1.02E-03         | 5.08E-04               | 0.74   | 10.101                 | 8.345                  |
| 4  | 15         | 1.02E-03         | 7.55E-04               | 0.98   | 10.181                 | 8.382                  |
| 5  | 20         | 1.02E-03         | 9.99E-04               | 1.22   | 10.233                 | 8.407                  |
| 6  | 25         | 1.02E-03         | 1.24E-03               | 1.45   | 10.266                 | 8.422                  |
| 7  | 30         | 1.02E-03         | 1.47E-03               | 1.68   | 10.290                 | 8.434                  |
| 8  | 35         | 1.02E-03         | 1.71E-03               | 1.90   | 10.307                 | 8.441                  |
| 9  | 40         | 1.02E-03         | 1.94E-03               | 2.34   | 10.322                 | 8.447                  |
| 10 | 50         | 1.02E-03         | 2.38E-03               | 2.77   | 10.341                 | 8.456                  |
| 11 | 60         | 1.02E-03         | 2.82E-03               | 3.58   | 10.356                 | 8.463                  |
| 12 | 80         | 1.02E-03         | 3.64E-03               | 4.35   | 10.369                 | 8.468                  |
| 13 | 100        | 1.02E-03         | 4.42E-03               | 6.09   | 10.377                 | 8.472                  |
| 14 | 150        | 1.02E-03         | 6.19E-03               | 7.61   | 10.388                 | 8.477                  |
| 15 | 200        | 1.02E-03         | 7.74E-03               | 10.14  | 10.391                 | 8.478                  |
| 16 | 300        | 1.02E-03         | 1.03E-02               | 12.17  | 10.394                 | 8.478                  |
| 17 | 400        | 1.02E-03         | 1.24E-02               | 15.21  | 10.398                 | 8.480                  |
| 18 | 600        | 1.02E-03         | 1.55E-02               | 0.25   | 10.398                 | 8.480                  |



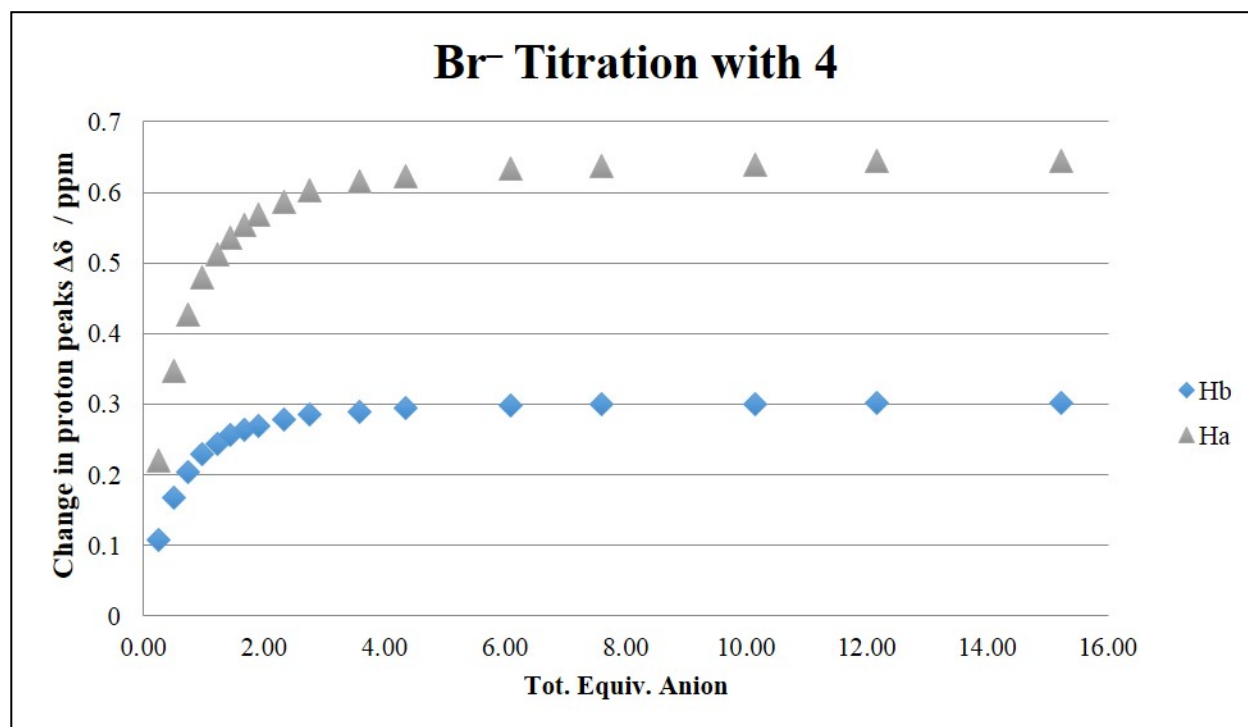

**Figure S12.** Binding isotherm for Br<sup>-</sup> titration with 4 in 10% *d*<sub>6</sub>-DMSO/CDCl<sub>3</sub> by <sup>1</sup>H NMR.

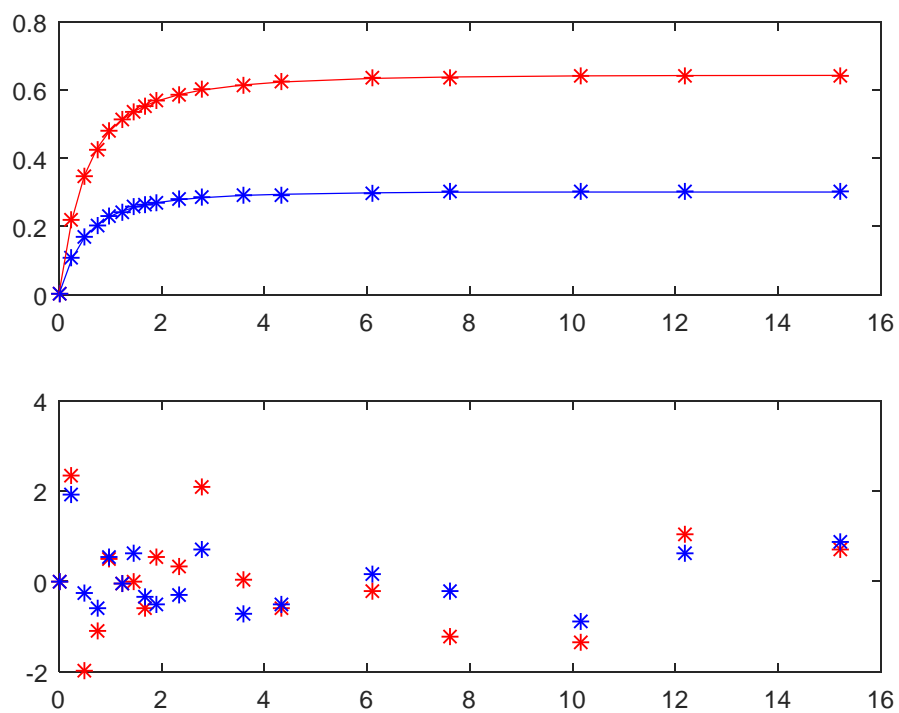

**Figure S13.** MatLab fit of binding isotherm for Br<sup>-</sup> titration with 4.

**Tetrabutylammonium iodide with 4.** A concentrated solution of **4** (5.21 mg, [R]=5.17 mM) in 10% *d*<sub>6</sub>-DMSO/CDCl<sub>3</sub> (2.00 mL) was prepared. A serial dilution was then performed with 576 μL of 5.17 mM solution of **4** diluted to 3 mL to yield the stock solution of **4** ([R]=0.994 mM). This solution was used in the dilution of TBAI guest solution (26.11mg, [G]=31.21 mM). The remaining stock solution (0.600 mL) was used as the starting volume in the NMR tube.

**Table S6.** Representative titration data for I<sup>-</sup> with **4**.

|    | Guest (μL) | [ <b>2</b> ] (M) | [I <sup>-</sup> ] (M) | Equiv. | H <sup>a</sup> δ (ppm) | H <sup>b</sup> δ (ppm) |
|----|------------|------------------|-----------------------|--------|------------------------|------------------------|
| 1  | 0          | 9.94E-04         | 0.00E+00              | 0.26   | 9.644                  | 8.131                  |
| 2  | 5          | 9.94E-04         | 2.58E-04              | 0.51   | 9.651                  | 8.135                  |
| 3  | 10         | 9.94E-04         | 5.12E-04              | 0.77   | 9.661                  | 8.141                  |
| 4  | 15         | 9.94E-04         | 7.61E-04              | 1.01   | 9.668                  | 8.146                  |
| 5  | 20         | 9.94E-04         | 1.01E-03              | 1.26   | 9.675                  | 8.151                  |
| 6  | 25         | 9.94E-04         | 1.25E-03              | 1.50   | 9.681                  | 8.154                  |
| 7  | 30         | 9.94E-04         | 1.49E-03              | 1.73   | 9.685                  | 8.156                  |
| 8  | 35         | 9.94E-04         | 1.72E-03              | 1.96   | 9.689                  | 8.160                  |
| 9  | 40         | 9.94E-04         | 1.95E-03              | 2.42   | 9.691                  | 8.161                  |
| 10 | 50         | 9.94E-04         | 2.40E-03              | 2.86   | 9.698                  | 8.166                  |
| 11 | 60         | 9.94E-04         | 2.84E-03              | 3.70   | 9.708                  | 8.170                  |
| 12 | 80         | 9.94E-04         | 3.67E-03              | 4.49   | 9.718                  | 8.177                  |
| 13 | 100        | 9.94E-04         | 4.46E-03              | 6.28   | 9.726                  | 8.183                  |
| 14 | 150        | 9.94E-04         | 6.24E-03              | 7.85   | 9.750                  | 8.197                  |
| 15 | 200        | 9.94E-04         | 7.80E-03              | 10.47  | 9.767                  | 8.206                  |
| 16 | 300        | 9.94E-04         | 1.04E-02              | 12.57  | 9.778                  | 8.214                  |
| 17 | 400        | 9.94E-04         | 1.25E-02              | 15.71  | 9.788                  | 8.223                  |
| 18 | 600        | 9.94E-04         | 1.56E-02              | 0.26   | 9.803                  | 8.230                  |

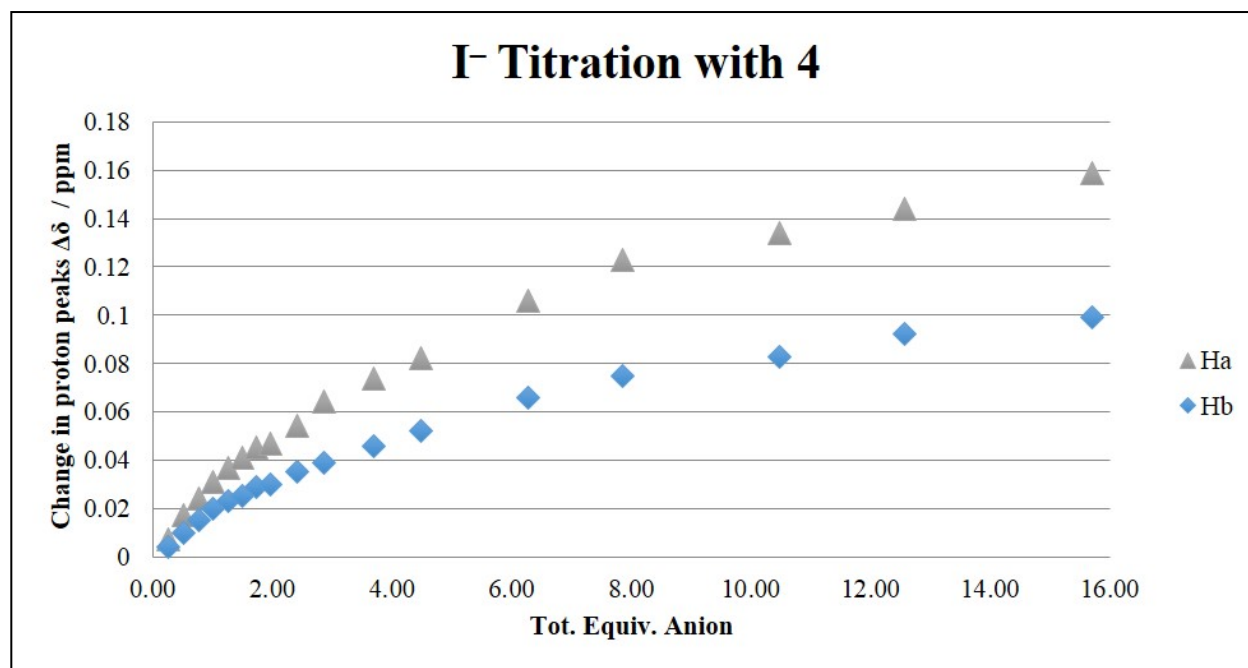

**Figure S14.** Binding isotherm for I<sup>-</sup> titration with **4** in 10% *d*<sub>6</sub>-DMSO/CDCl<sub>3</sub> by <sup>1</sup>H NMR.

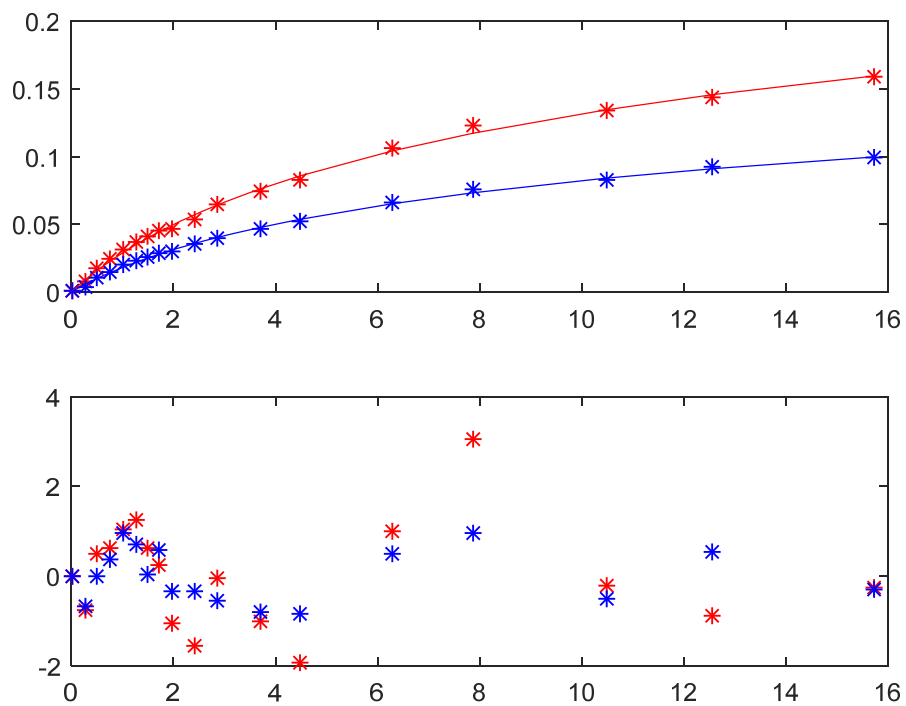

**Figure S15.** MatLab fit of binding isotherm for I<sup>-</sup> titration with **4**.

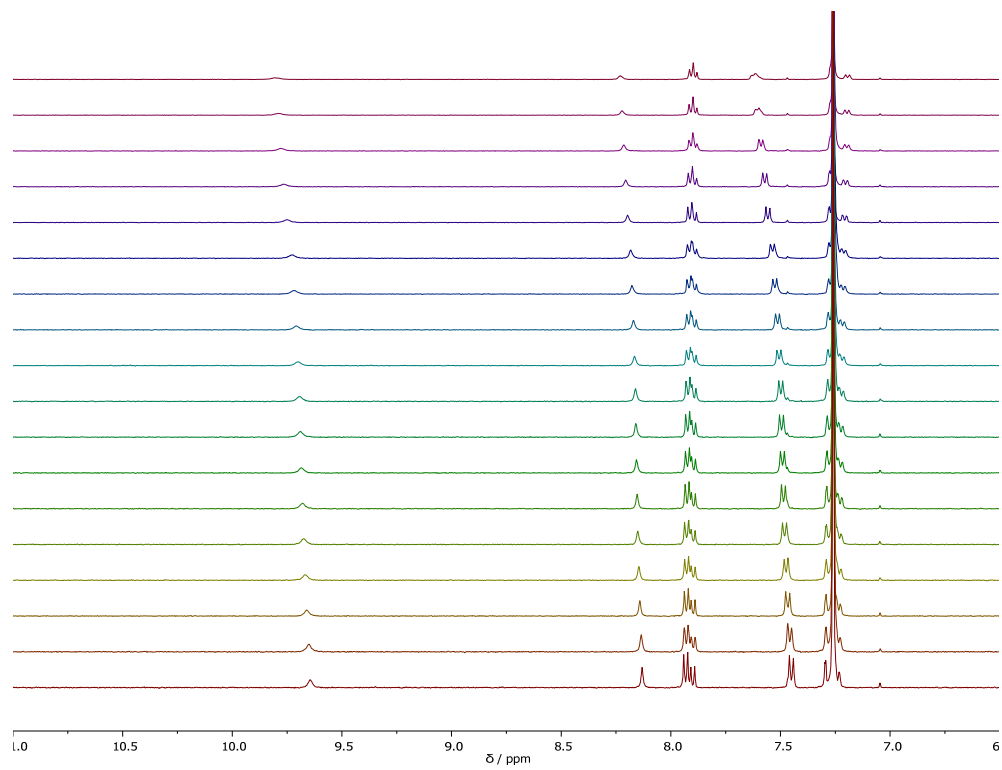

**Figure S16.** <sup>1</sup>H NMR spectra of I<sup>-</sup> titration with **4**.

## UV-Vis Titrations

**General Conditions.** UV-Vis titrations were carried out on an HP 8453 UV-Vis spectrometer. Water-saturated 10% DMSO/CHCl<sub>3</sub> was prepared in the same manner as for the <sup>1</sup>H NMR titrations. Association constants were determined by non-linear regression using Open Data Fit.<sup>5</sup>

**Tetrabutylammonium chloride with 4.** A concentrated solution of **4** (2.00 mg, [R]=0.199 mM) in 10% DMSO/CHCl<sub>3</sub> (20.00 mL) was prepared. A serial dilution was then performed with 50 μL of 0.199 mM solution of **4** diluted to 5 mL to yield the stock solution of **4** ([R]= 1.99 μM). A 2 mL solution of TBACl (2.53 mg, [G]=0.984 mM) was prepared by serial dilution with the stock solution of **4**. The starting volume in the cuvette was 2.0 mL.

**Table S7.** Representative titration data for Cl<sup>-</sup> with **4**.

|    | Guest (μL) | [ <b>2</b> ] (M) | [Cl <sup>-</sup> ] (M) | Equiv. |
|----|------------|------------------|------------------------|--------|
| 1  | 0          | 1.99E-06         | 0.00E+00               | 0.00   |
| 2  | 5          | 1.99E-06         | 2.45E-06               | 1.23   |
| 3  | 10         | 1.99E-06         | 4.89E-06               | 2.46   |
| 4  | 15         | 1.99E-06         | 9.74E-06               | 4.90   |
| 5  | 20         | 1.99E-06         | 1.93E-05               | 9.71   |
| 6  | 25         | 1.99E-06         | 2.87E-05               | 14.42  |
| 7  | 30         | 1.99E-06         | 3.78E-05               | 19.05  |
| 8  | 40         | 1.99E-06         | 4.68E-05               | 23.58  |
| 9  | 50         | 1.99E-06         | 5.79E-05               | 29.13  |
| 10 | 60         | 1.99E-06         | 6.86E-05               | 34.55  |
| 11 | 70         | 1.99E-06         | 8.94E-05               | 45.02  |
| 12 | 80         | 1.99E-06         | 1.09E-04               | 55.03  |
| 13 | 100        | 1.99E-06         | 1.28E-04               | 64.60  |
| 14 | 120        | 1.99E-06         | 1.47E-04               | 73.76  |
| 15 | 140        | 1.99E-06         | 1.64E-04               | 82.54  |
| 16 | 180        | 1.99E-06         | 1.97E-04               | 99.05  |
| 17 | 220        | 1.99E-06         | 2.27E-04               | 114.28 |
| 18 | 300        | 1.99E-06         | 2.55E-04               | 128.39 |
| 19 | 400        | 1.99E-06         | 3.05E-04               | 153.69 |
| 20 | 600        | 1.99E-06         | 3.49E-04               | 175.73 |
| 21 | 800        | 1.99E-06         | 4.22E-04               | 212.24 |

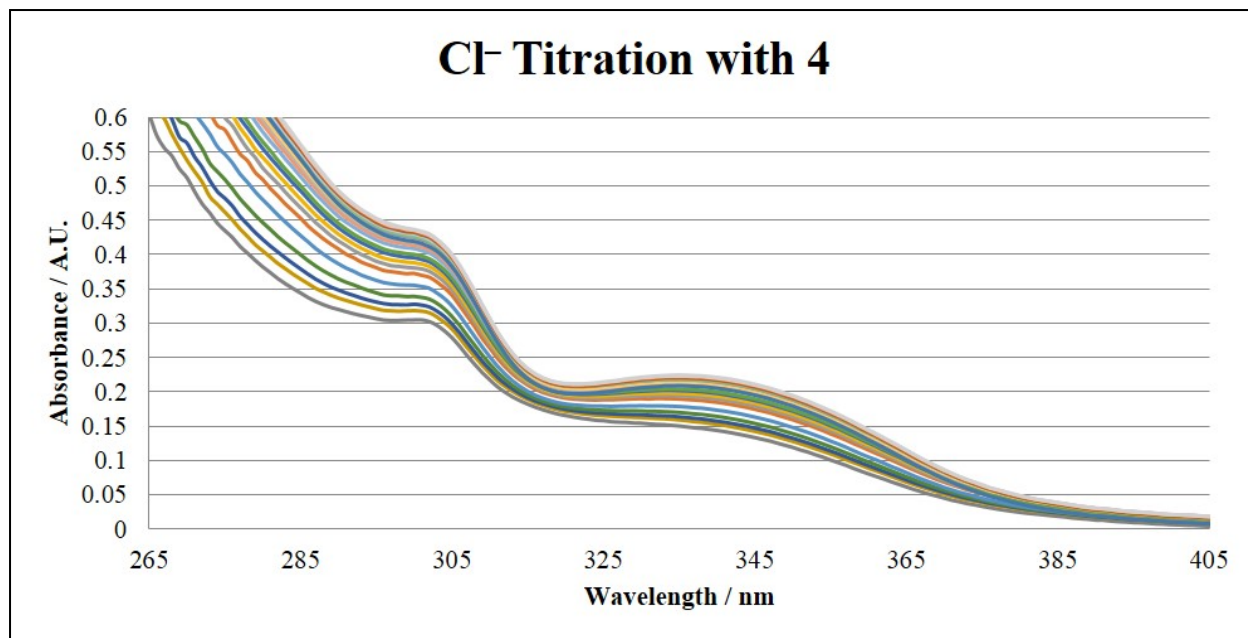

**Figure S17.** UV-Vis spectra of **4** titrated with Cl<sup>-</sup> in 10% -DMSO/CHCl<sub>3</sub>.

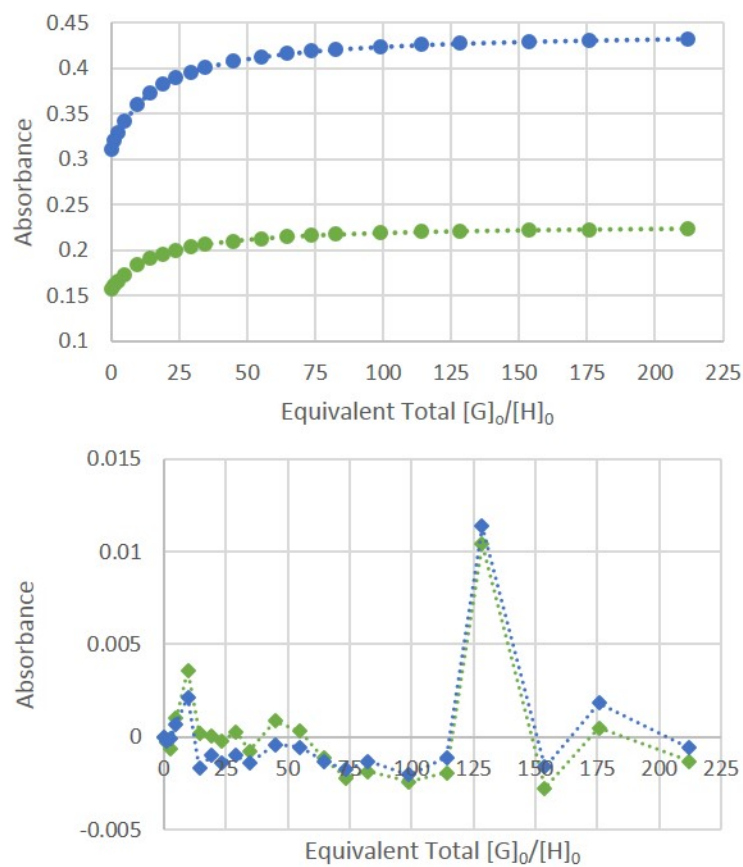

**Figure S18.** Open Data Fit fit of binding isotherm for Cl<sup>-</sup> titration with **4**.

## Job's Plot Analysis

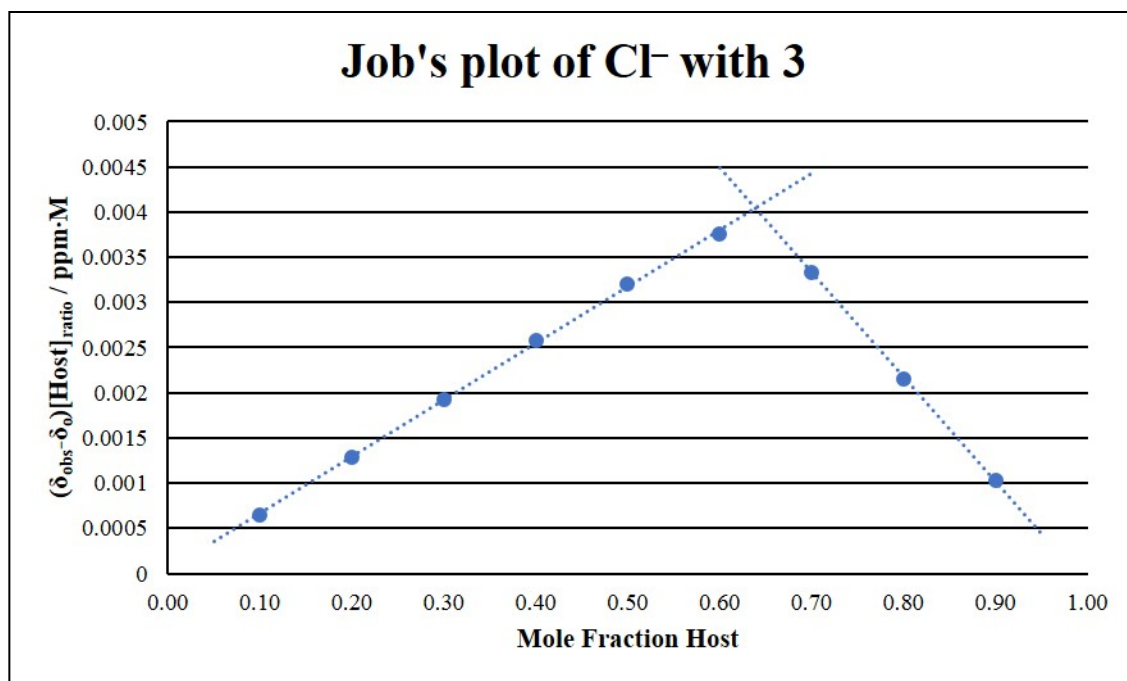

**Figure S18.** Job's plot analysis for Cl<sup>-</sup> titration with **3** in 10% *d*<sub>6</sub>-DMSO/CDCl<sub>3</sub> by <sup>1</sup>H NMR.

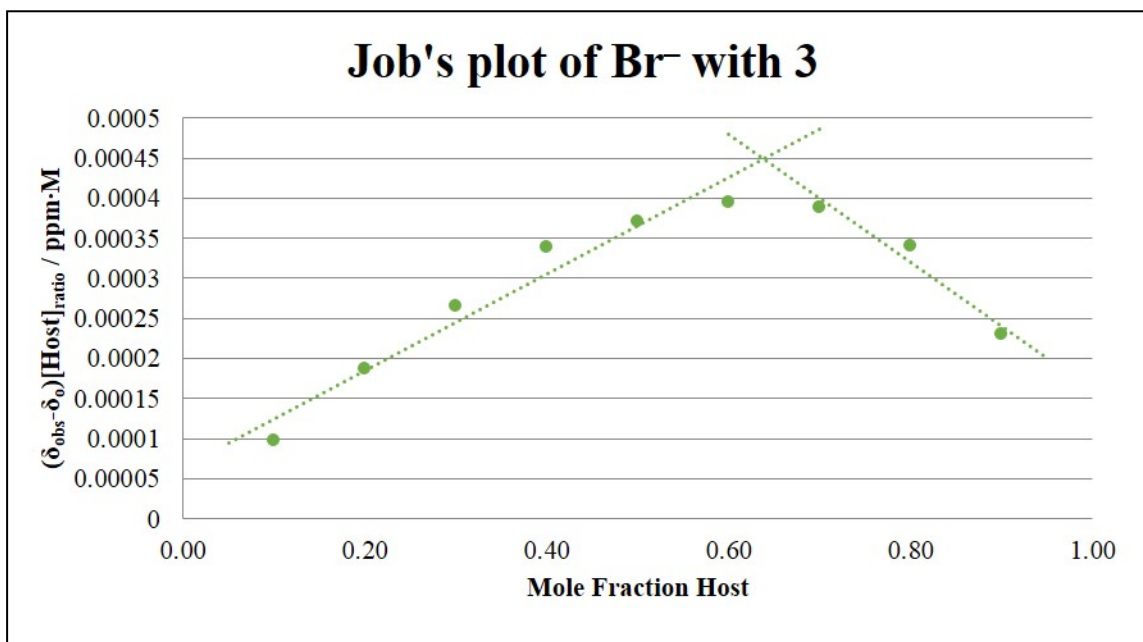

**Figure S19.** Job's plot analysis for Br<sup>-</sup> titration with **3** in 10% *d*<sub>6</sub>-DMSO/CDCl<sub>3</sub> by <sup>1</sup>H NMR.

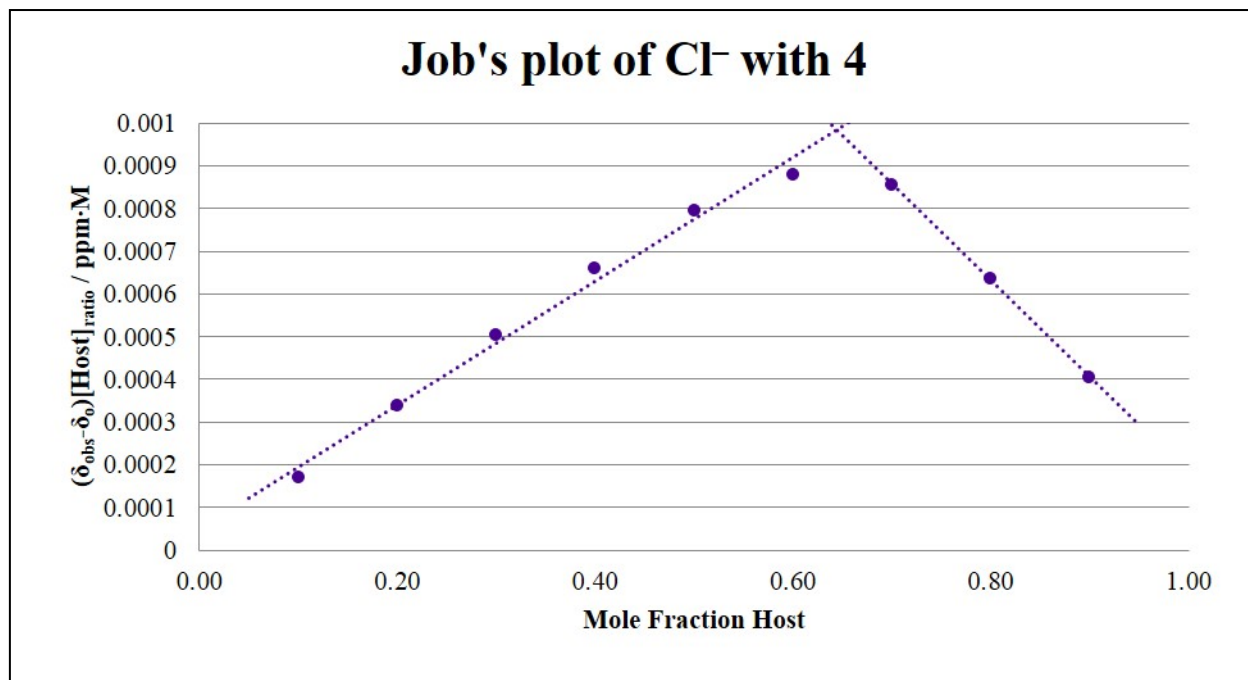

**Figure S20.** Job's plot analysis for Cl<sup>-</sup> titration with **4** in 10% *d*<sub>6</sub>-DMSO/CDCl<sub>3</sub> by <sup>1</sup>H NMR.

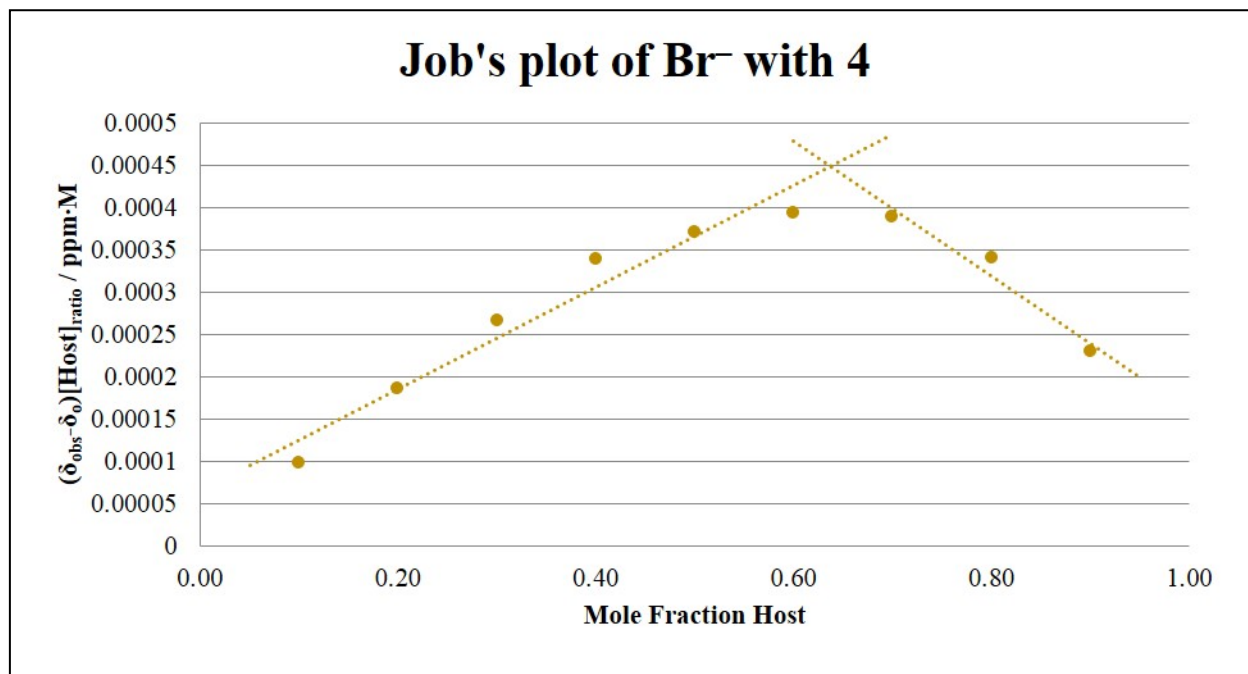

**Figure S21.** Job's plot analysis for Br<sup>-</sup> titration with **4** in 10% *d*<sub>6</sub>-DMSO/CDCl<sub>3</sub> by <sup>1</sup>H NMR.



## References

1. (a) C. N. Carroll, B. A. Coombs, S. P. McClintock, C. A. Johnson, O. B. Berryman, D. W. Johnson, M. M. Haley, *Chem. Commun.* **2011**, *47*, 5539–5541; (b) C. N. Carroll, O. B. Berryman, C. A. Johnson, L. N. Zakharov, M. M. Haley, D. W. Johnson, *Chem. Commun.* **2009**, 2520–2522.
2. G. M. Sheldrick, *Bruker/Siemens Area Detector Absorption Correction Program*, Bruker AXS, Madison, WI, 1998.
3. G. M. Sheldrick, *Acta Cryst.* **2015**, *C71*, 3–8.
4. P. Thordarson, *Chem. Soc. Rev.* **2011**, *40*, 1305–1323.
5. <http://supramolecular.org>

# NMR Spectra

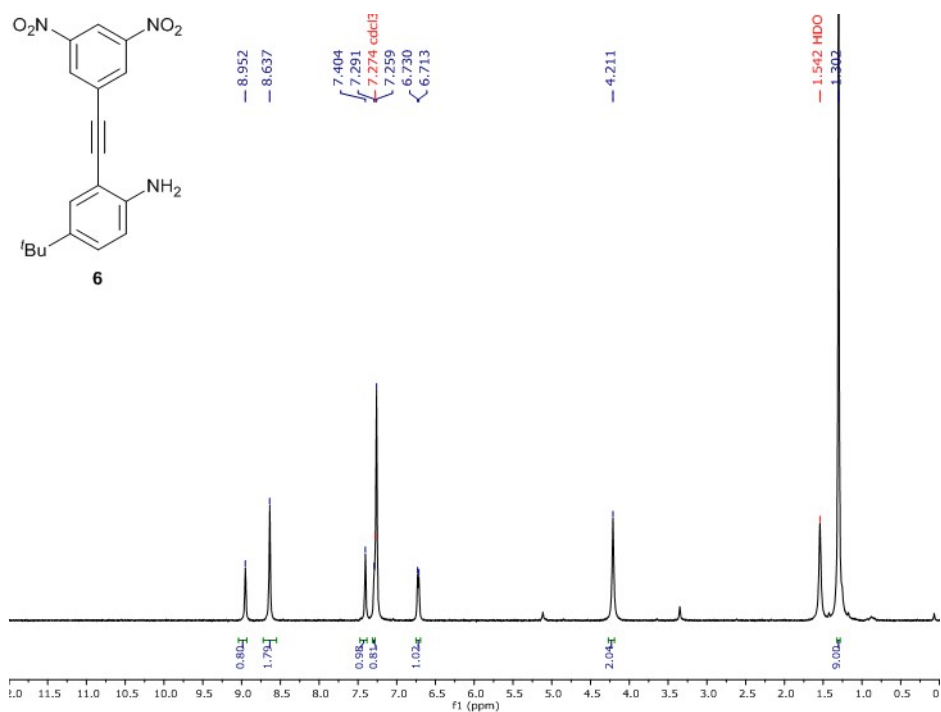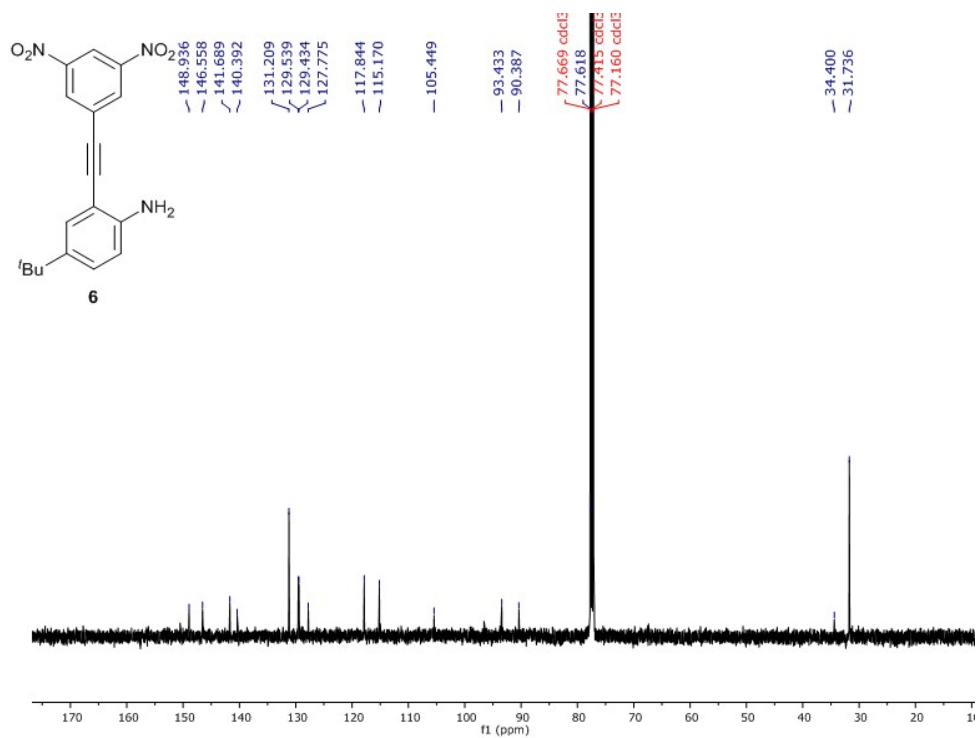

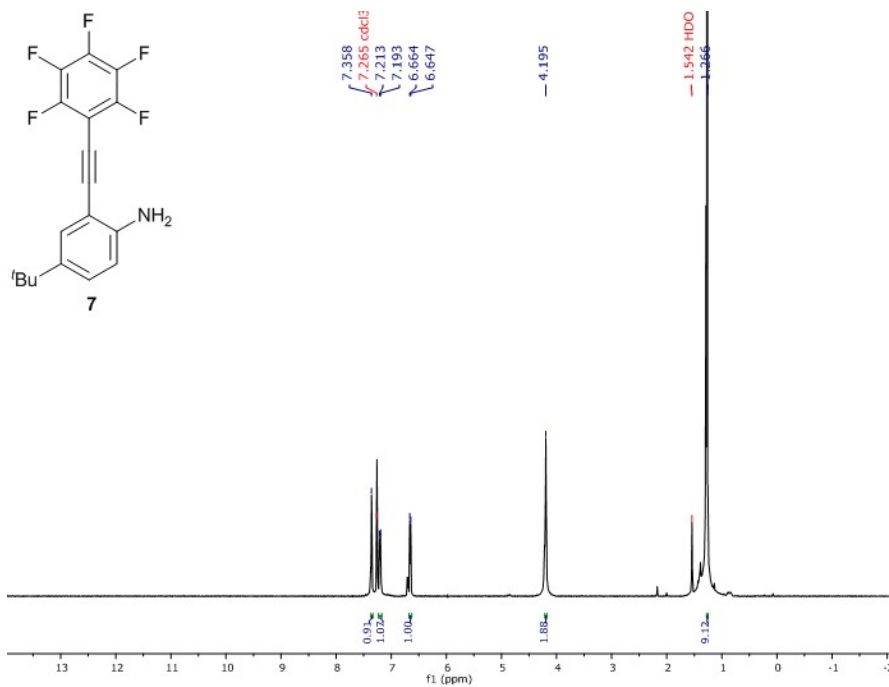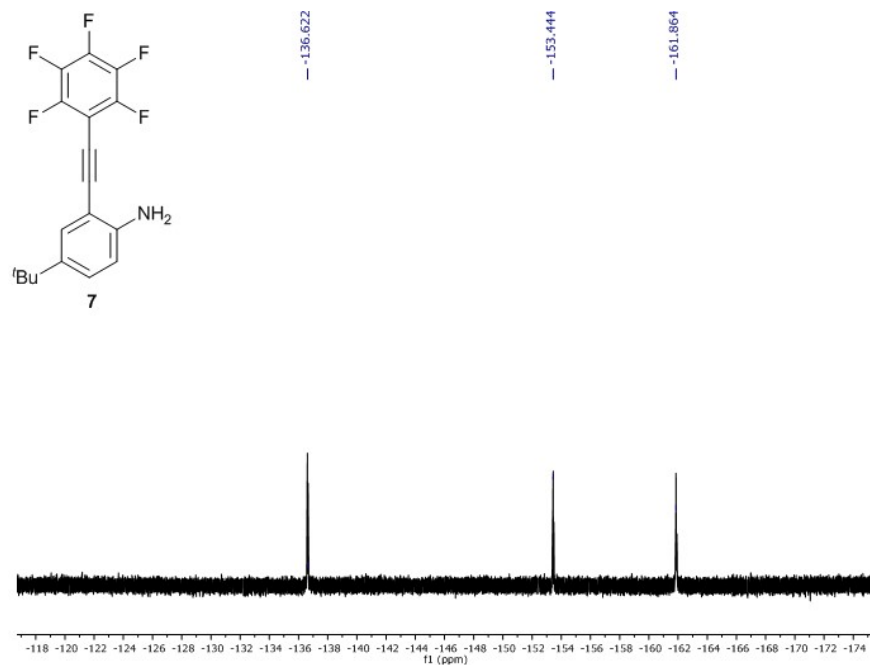

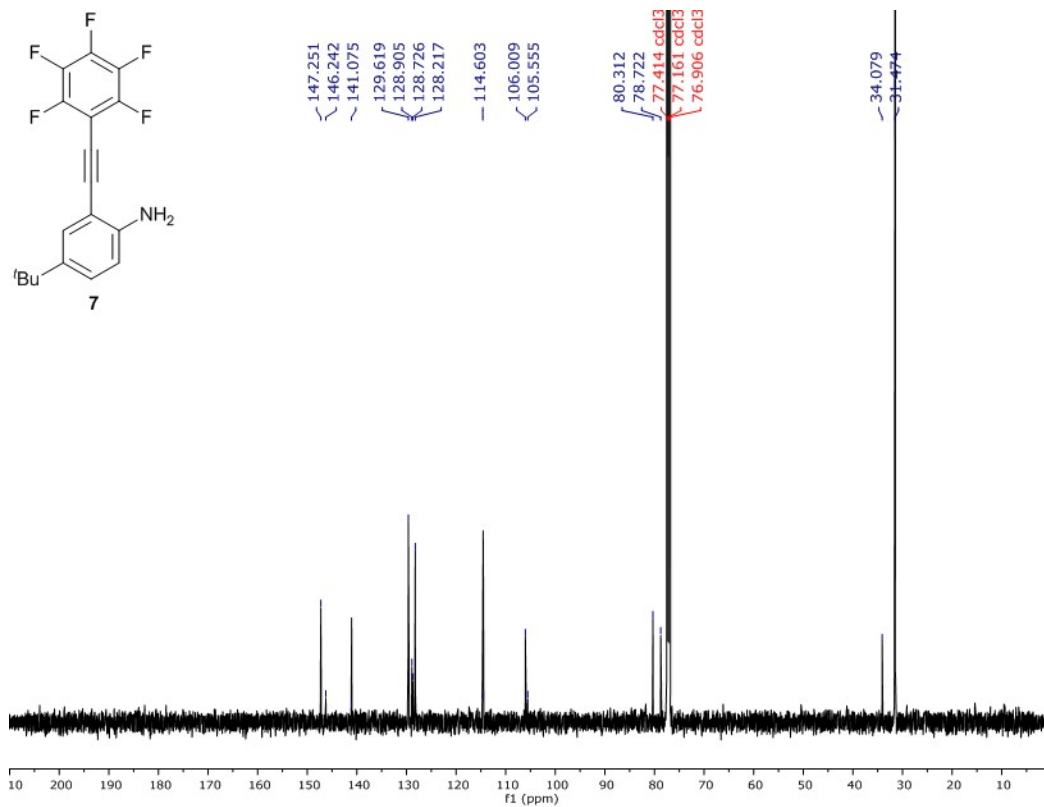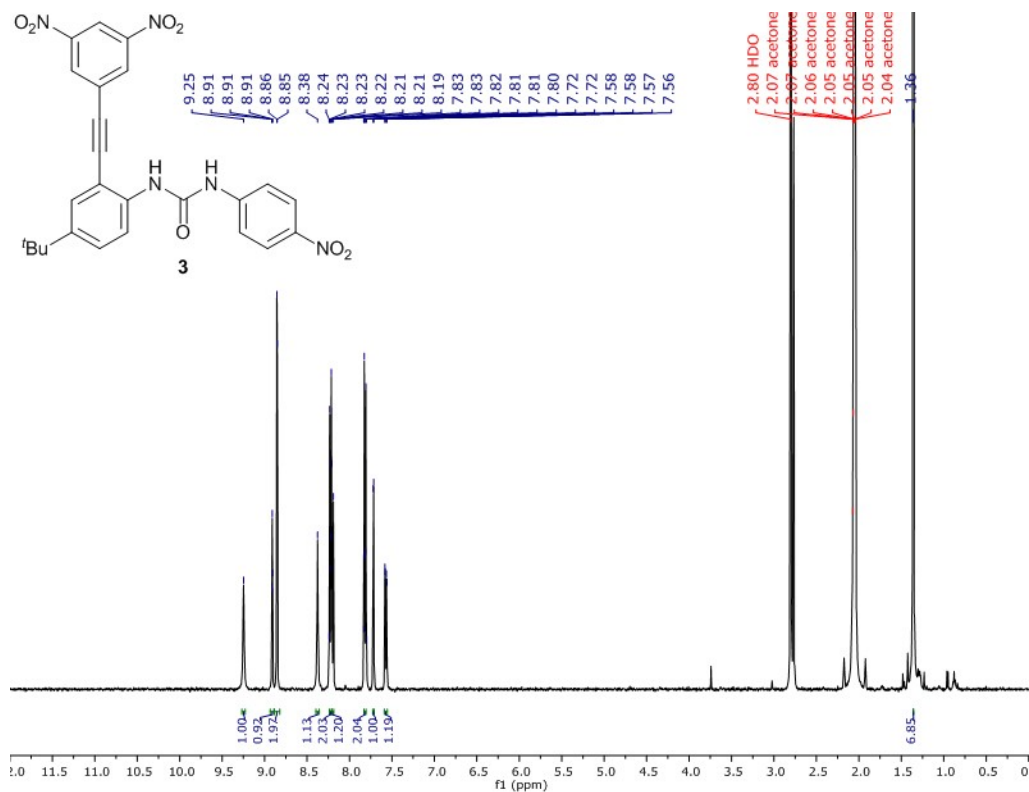

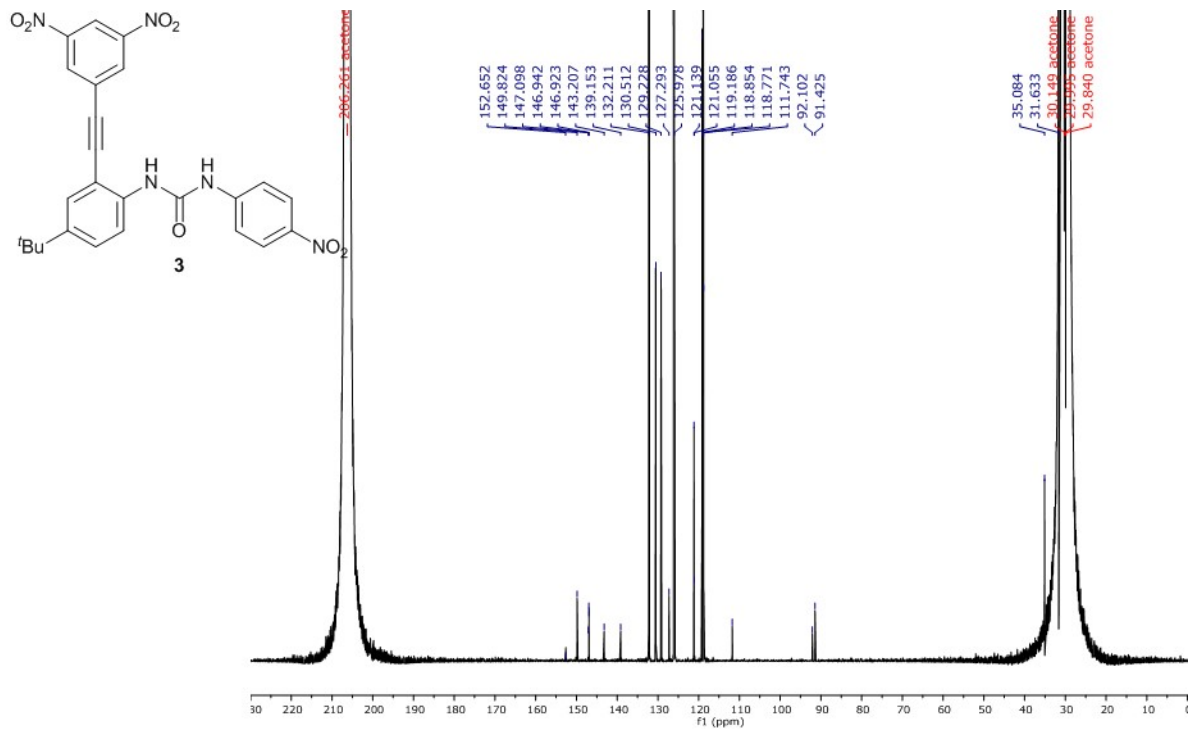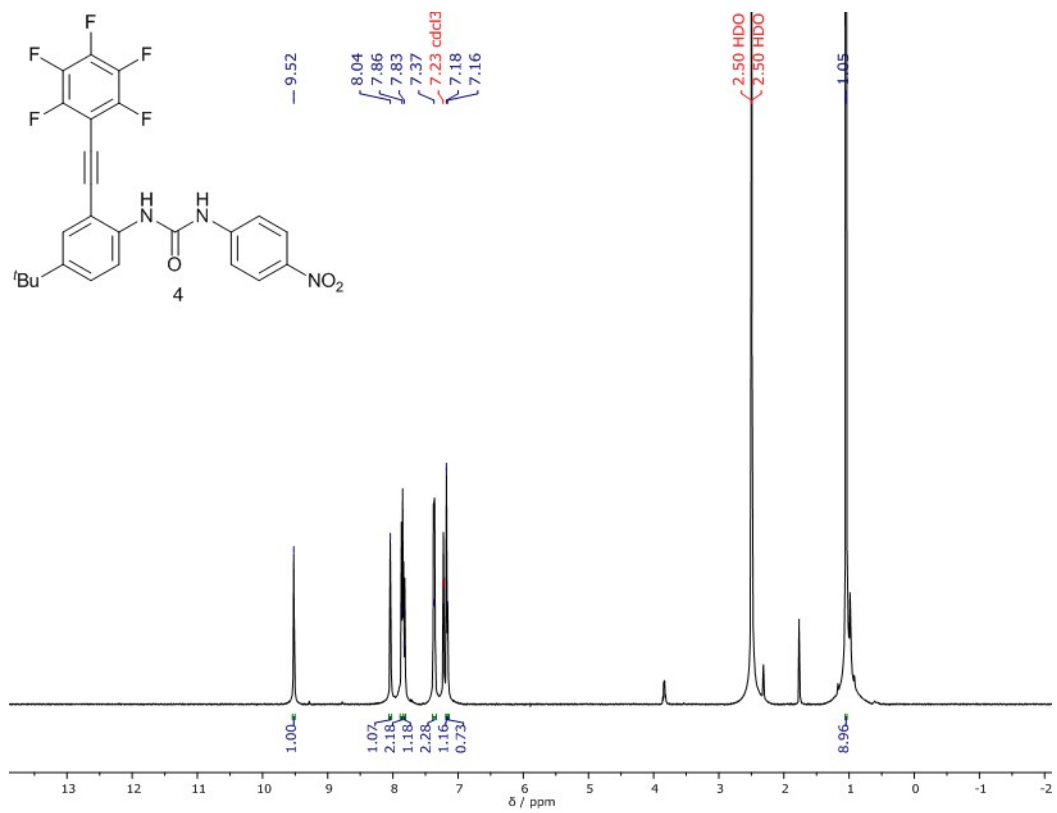

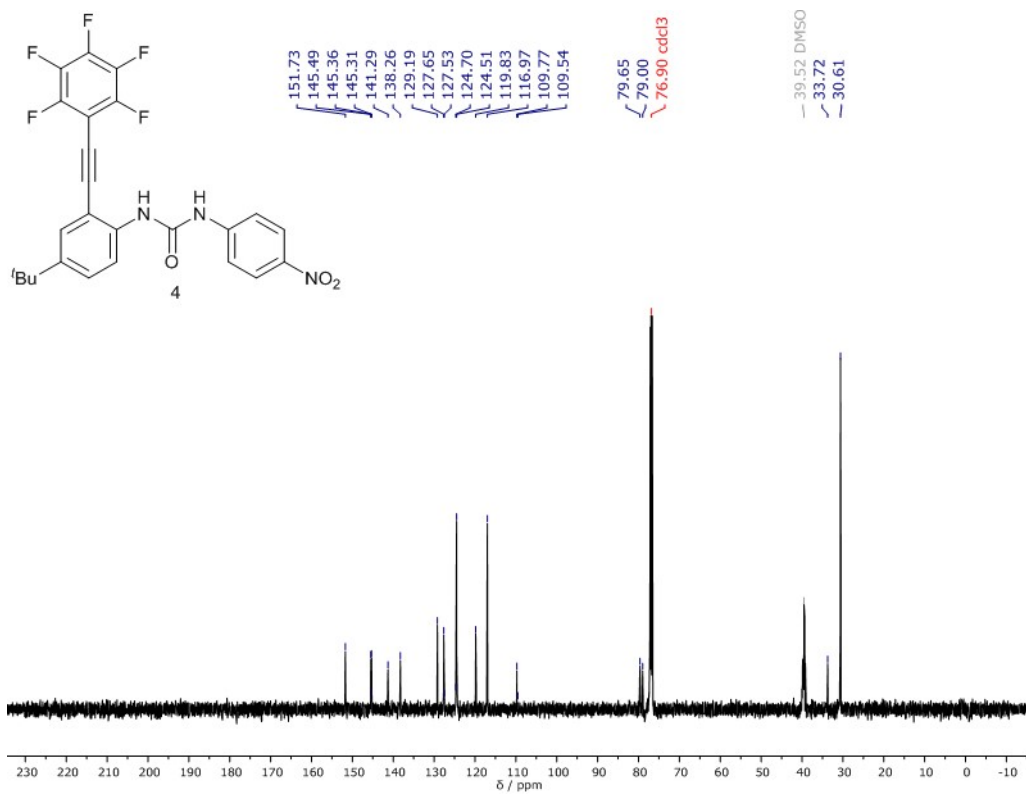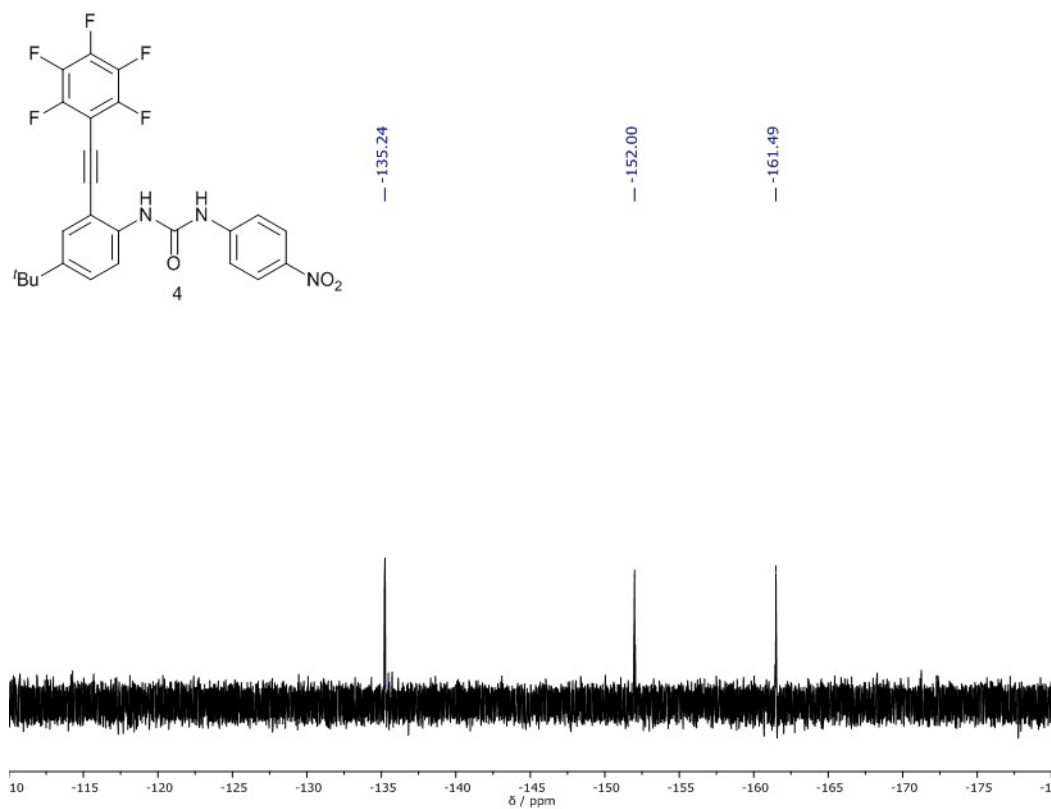

Supplement: NIHMS873170-supplement-ESI.pdf [file NIHMS873170-supplement-ESI.pdf]
